# Supplementary material for: Genetic architecture of heart failure with preserved versus reduced ejection fraction
Source: PubMed Central journal article supplement (PMC9751124; doi:10.1038/s41467-022-35323-0), 2022-12-14
Supplement: 41467_2022_35323_MOESM1_ESM.pdf [file 41467_2022_35323_MOESM1_ESM.pdf]

## Supplementary Information

### Supplementary Methods

Comorbidities were curated from the national databases using the International Classification of Diseases (ICD)-10 and ICD-9 codes. The codes used to extract each comorbidity are listed below (% sign indicates that any code with the preceding number was utilized).

#### Atrial Fibrillation:

ICD-9: 427.31%

ICD-10: I48.2%, I48.0%, I48.91%, I48.1%

#### Coronary Artery Disease:

ICD-9: 410%, 411%, 412%, 413%, 414%

ICD-10: I20%, I21%, I22%, I23%, I24%, I25%

#### Chronic Kidney Disease:

ICD-9: 403.01%, 404.02%, 404.10%, 585.00%, 403.11%, 404.03%, 404.90%, 586.00%, 403.91%, 404.10%, 584.00%, 792.50%

ICD-10: V42.0%, V56.0%, V56.3%, N18%, V45.1%, V56.1%, V56.8%, V56.2%

#### Diabetes Mellitus:

ICD-9: 250%

ICD-10: E08%, E09%, E10%, E11%, E12%, E13%

#### Hyperlipidemia:

ICD-9: 272%

ICD-10: E78.0, E75.249, E78.01, E77.0, E78.1, E77.1, E78.2, E78.81, E78.3, E78.89, E78.4, E78.9, E78.5, E88.1, E78.6, E88.89, E75.21, E75.22

#### Hypertension:

ICD-9: 401%, 402%, 403%, 404%, 405%

ICD-10: I10%, I11%, I12%, I13%, I15%, I16%, I67.4%

#### Peripheral Vascular Disease:

ICD-9: 440%, 441%, 442%, 443%, 444%, 447%, 451%, 452%, 453%, 557%

ICD-10: E08.51, E08.52, E09.51, E09.52, E10.51, E10.52, E11.51, E11.52, E13.51, E13.52, I67.0, I70.0, I70%, I71%, I72%, I73.01, I73.1, I73.81, I73.89, I73.9, I74.01, I74.09, I74.10, I74.11, I74.19, I74.2, I74.3, I74.4, I74.5, I74.8, I74.9, I77%, I79.0, I79.1, I79.8, I80%, I81, I82%, K55%, K76.5, M31.8, M31.9

#### Stroke or Transient Ischemic Attack:

ICD-9: 430%, 431%, 433%, 434%, 436%, 437.0%, 437.6%

ICD-10: I63%, I65%, I66%, I67.2%, I67.8%, I67.6%, I60%, I61%, G45%

## Supplementary Figures

**Supplementary Figure 1.** Quantile-quantile plot of genome-wide meta-analysis of heart failure.

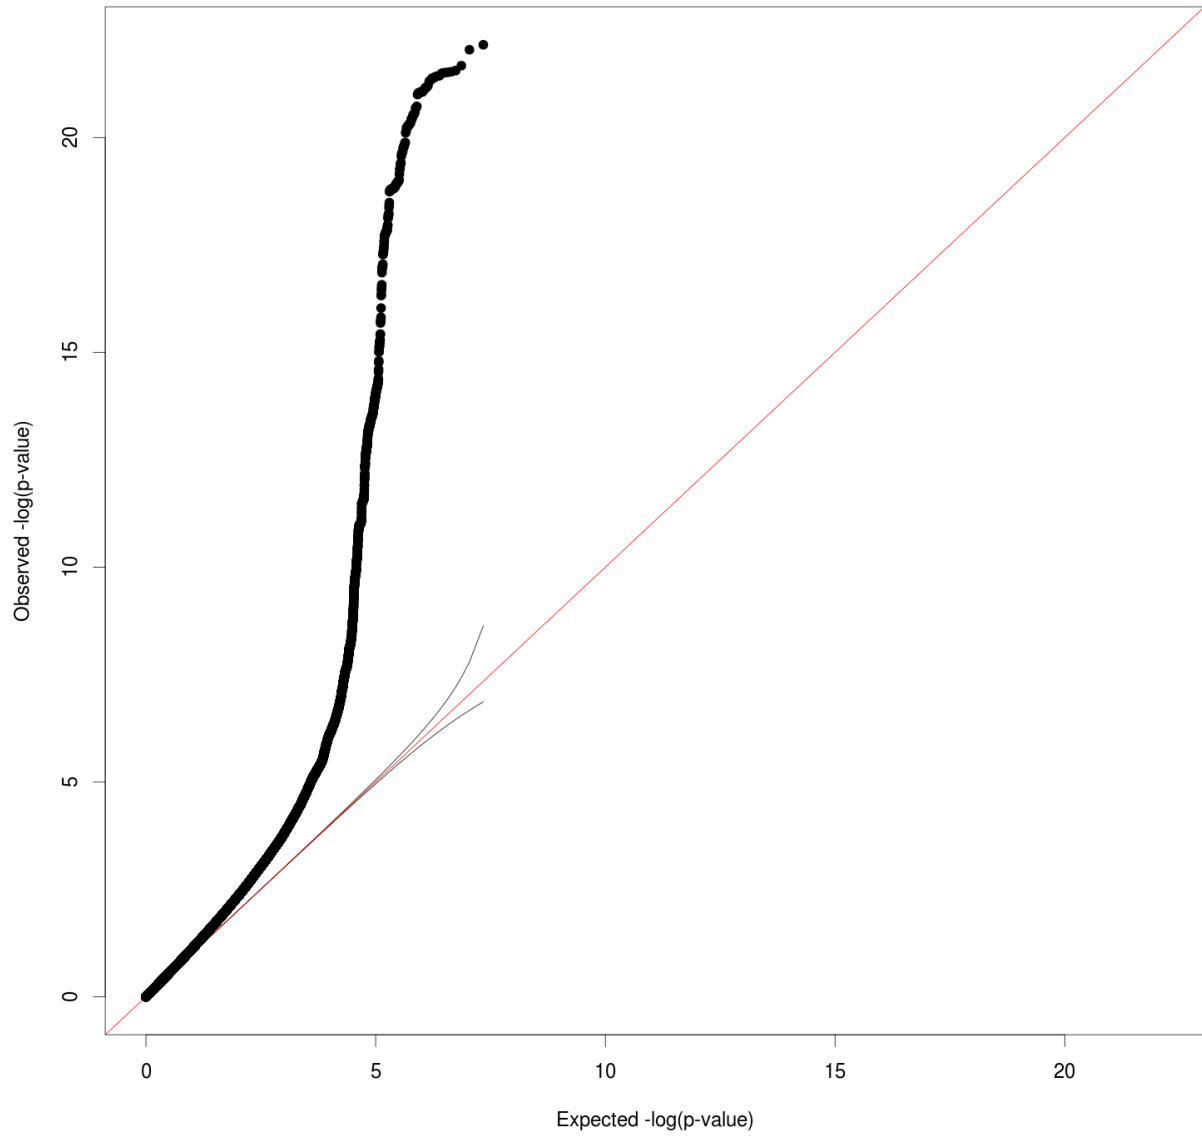

Supplementary Figure 2. Manhattan plot of genome-wide meta-analysis of unclassified heart failure.

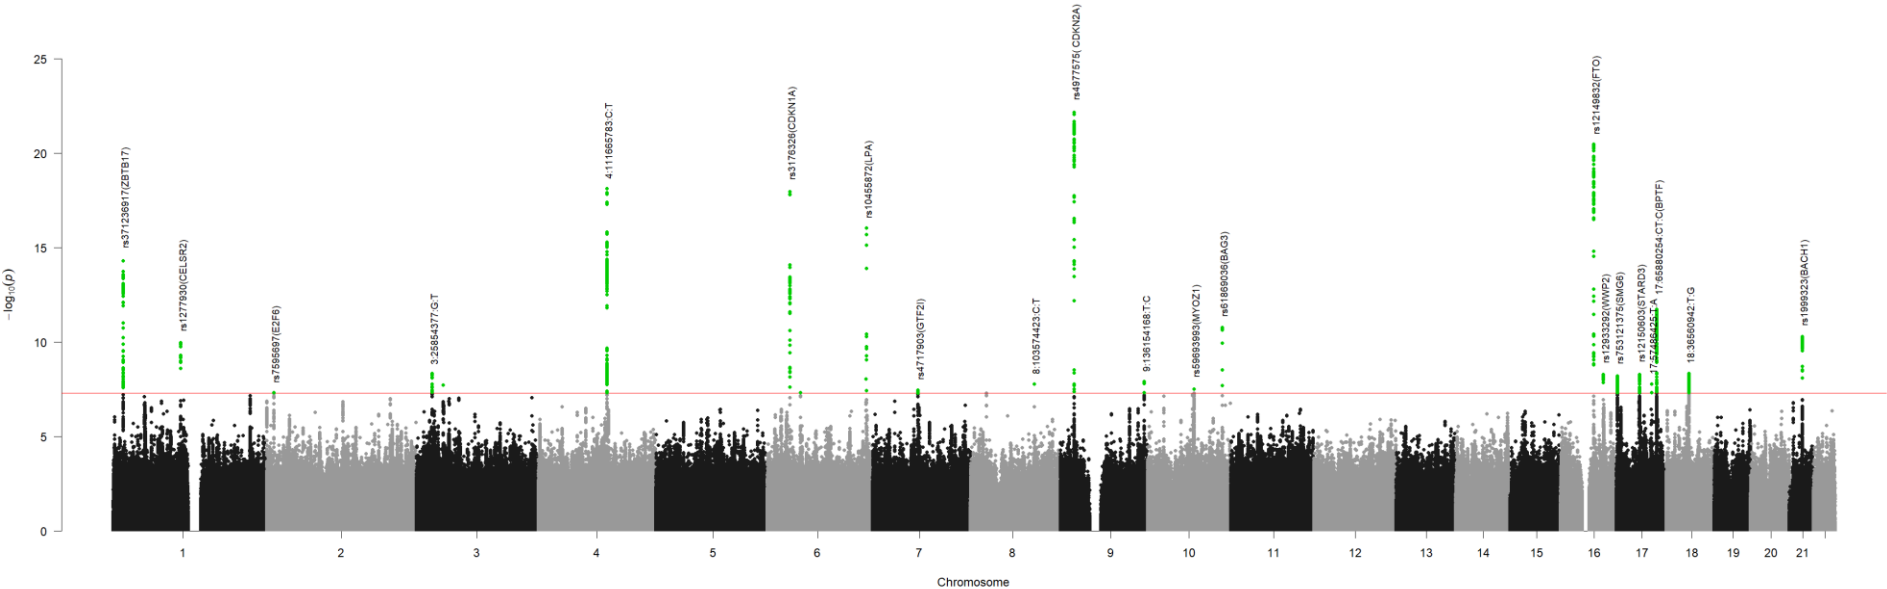

**Supplementary Figure 3A-T.** Genome-wide significant loci (n=20) associated with heart failure.

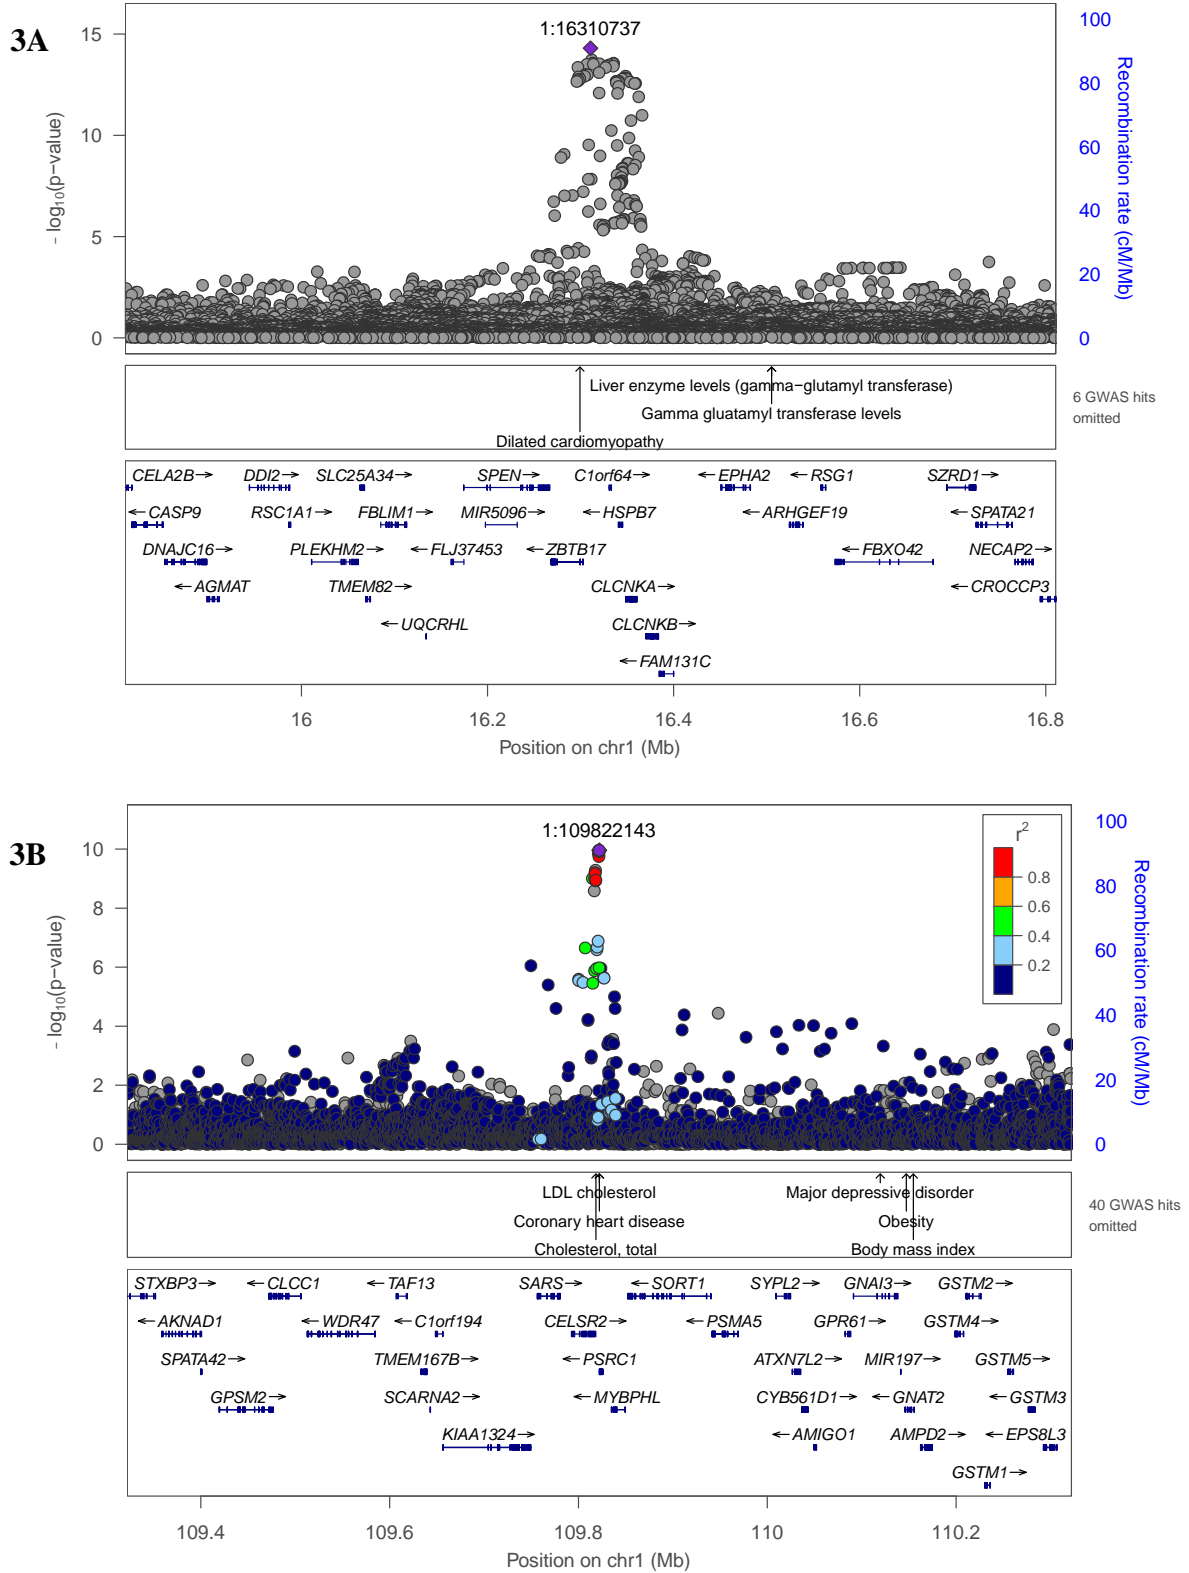

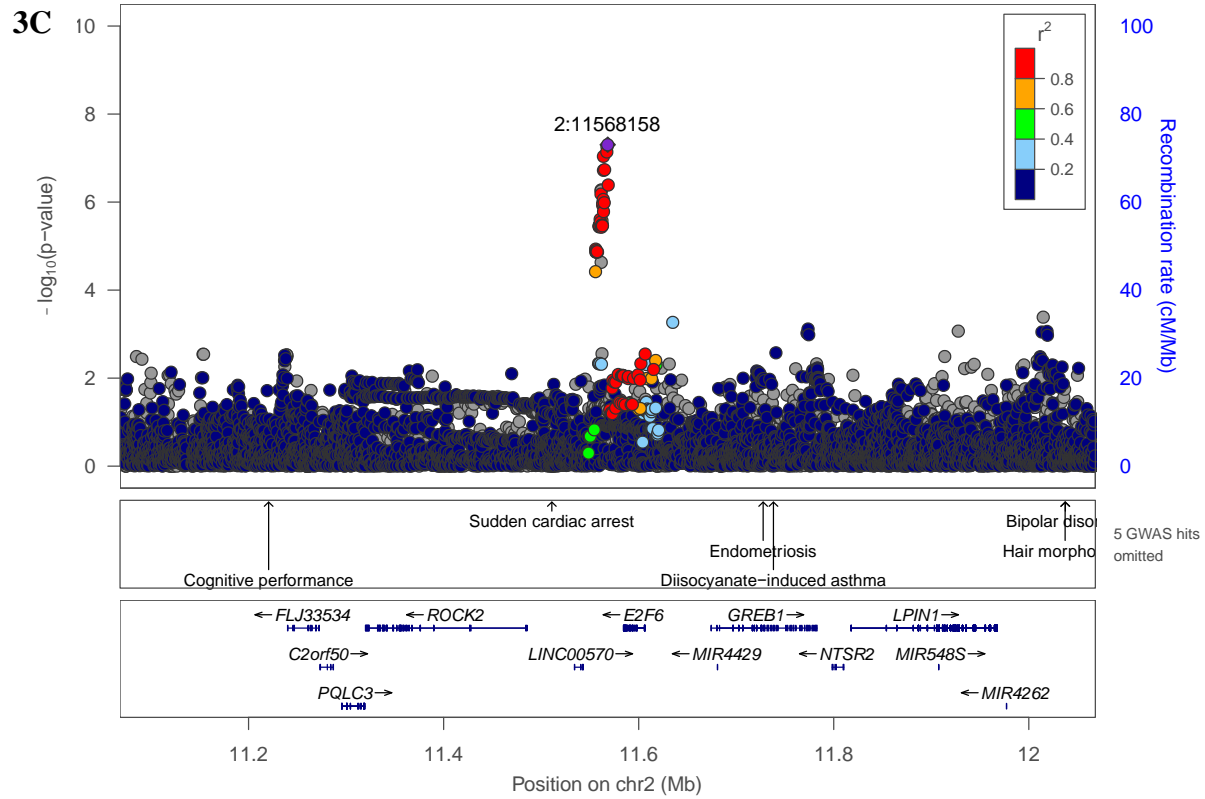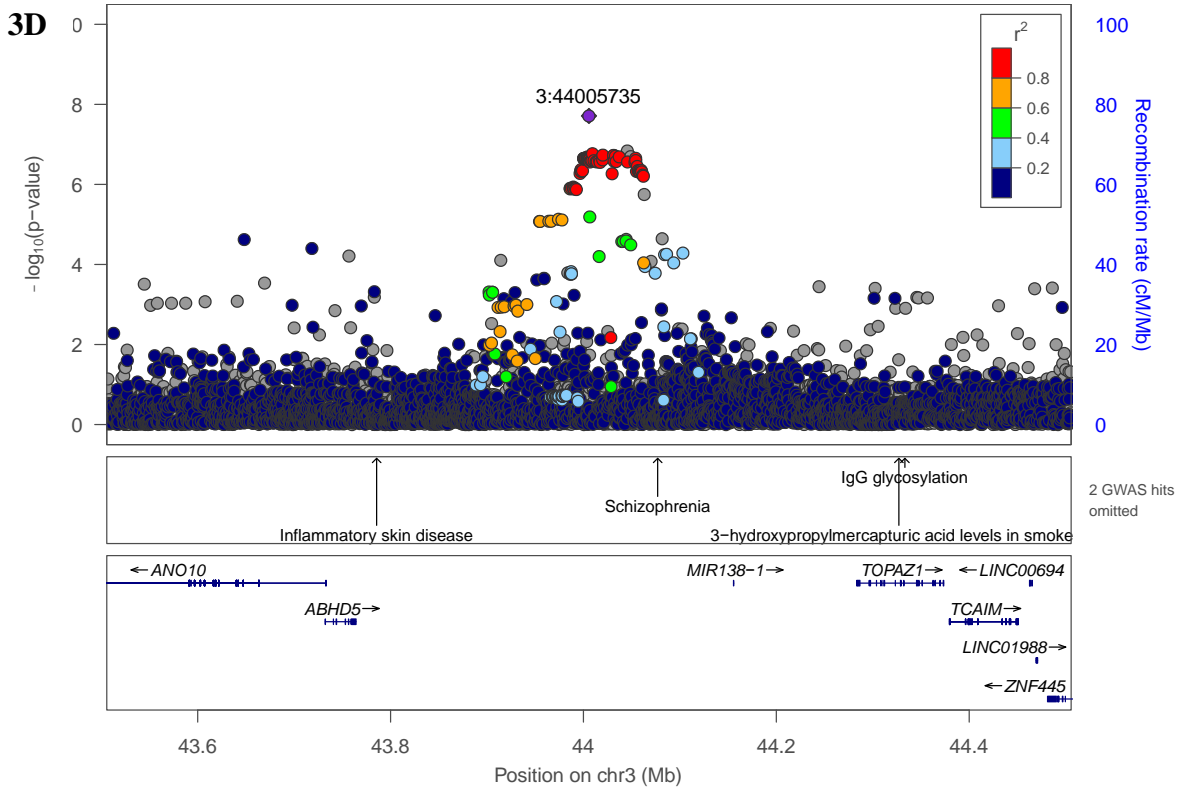

**3E**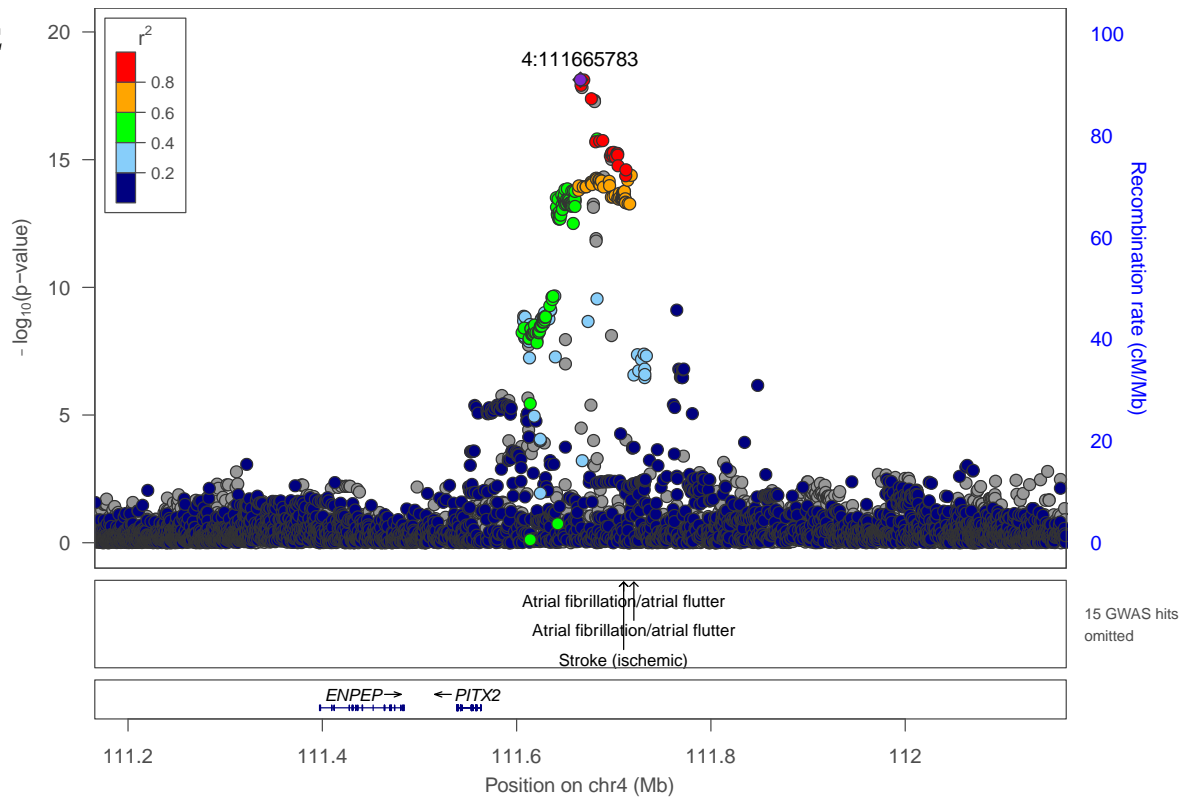**3F**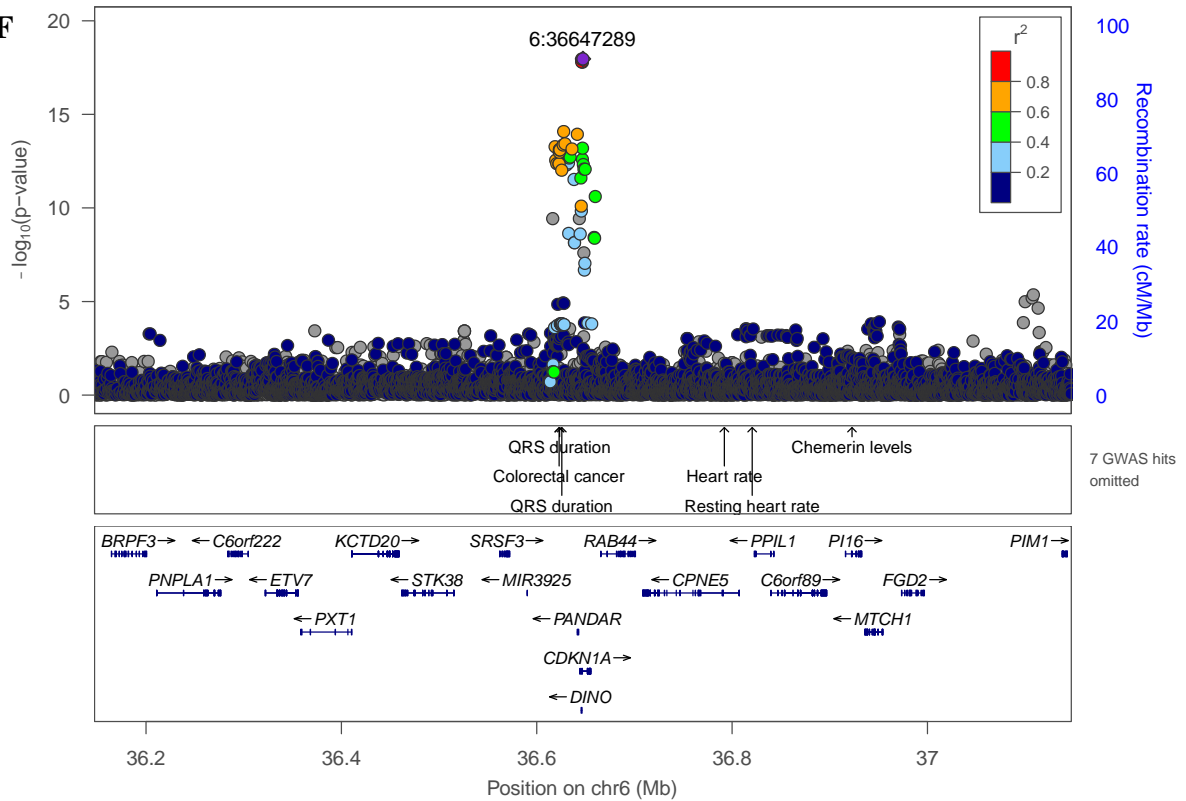

3G

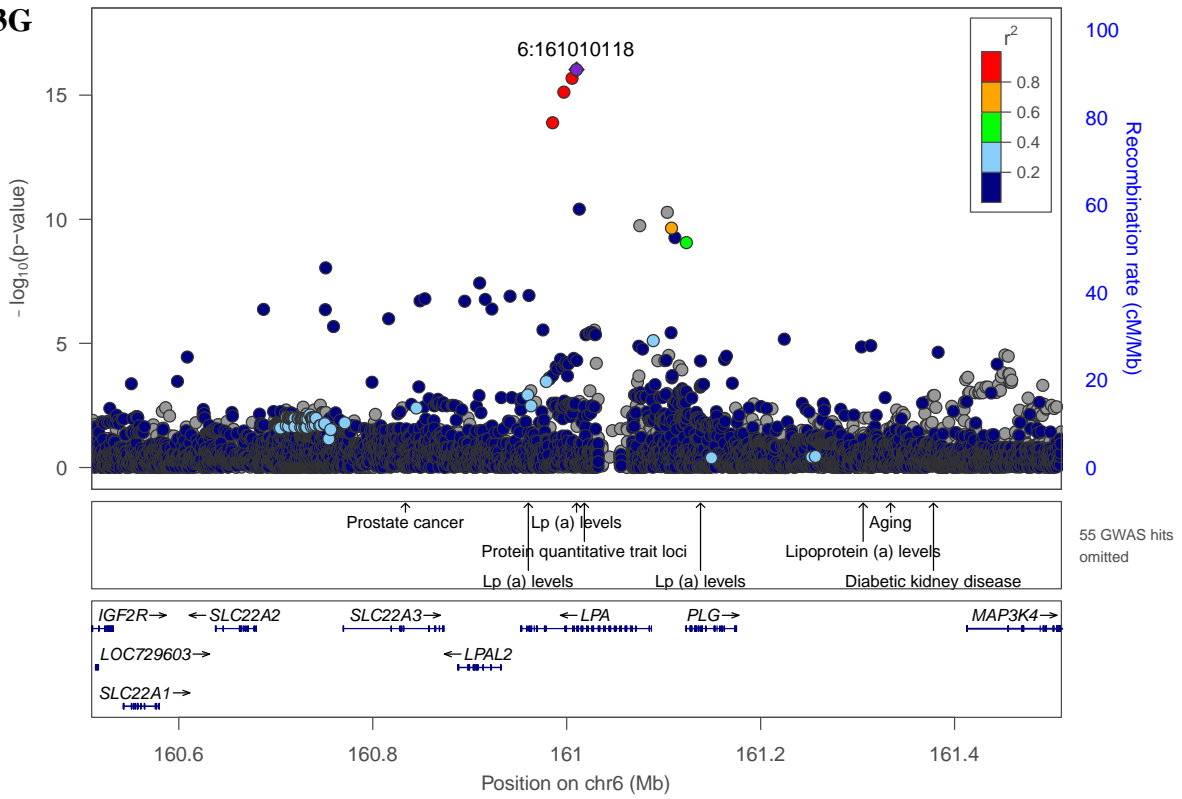

3H

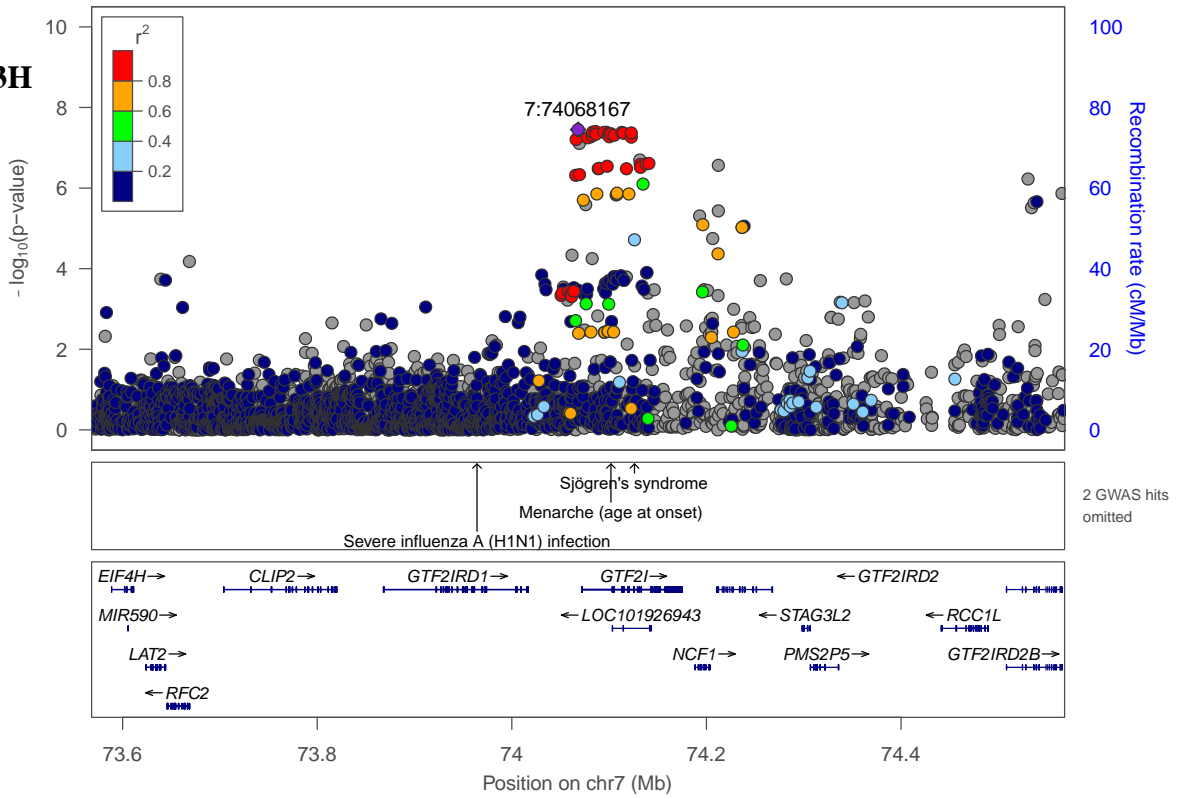

**3I**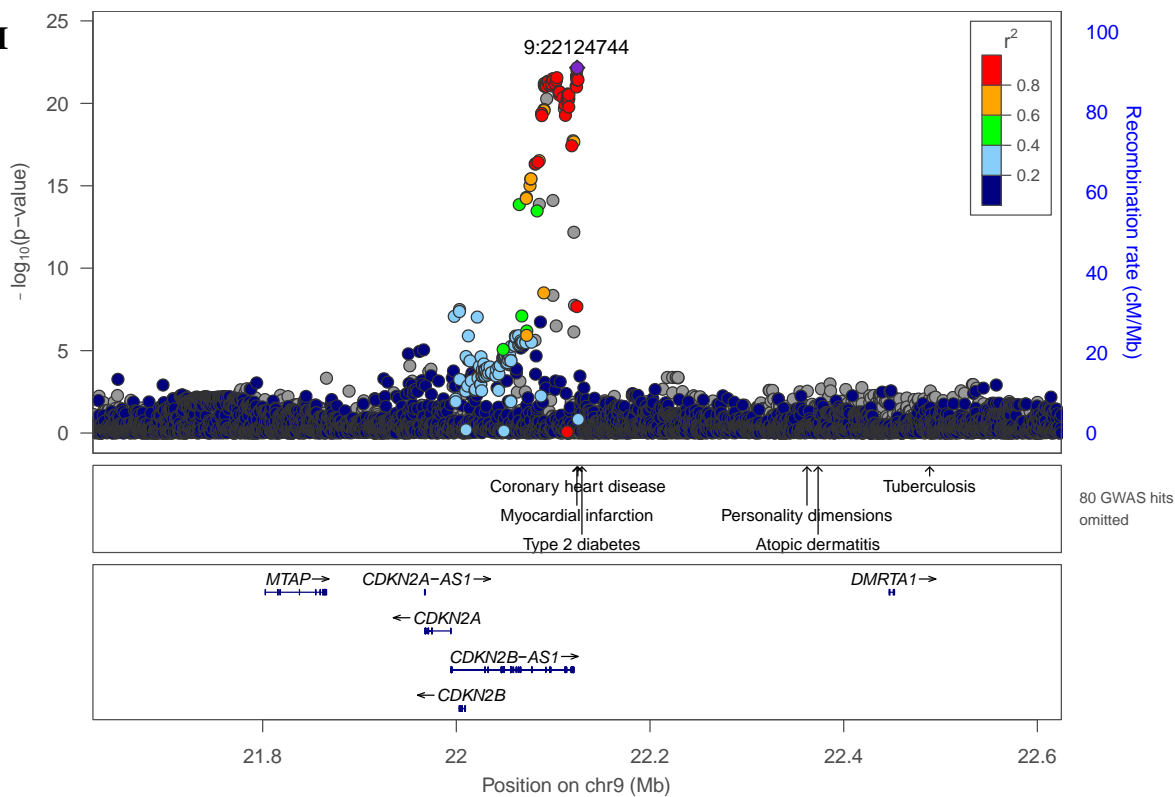**3J**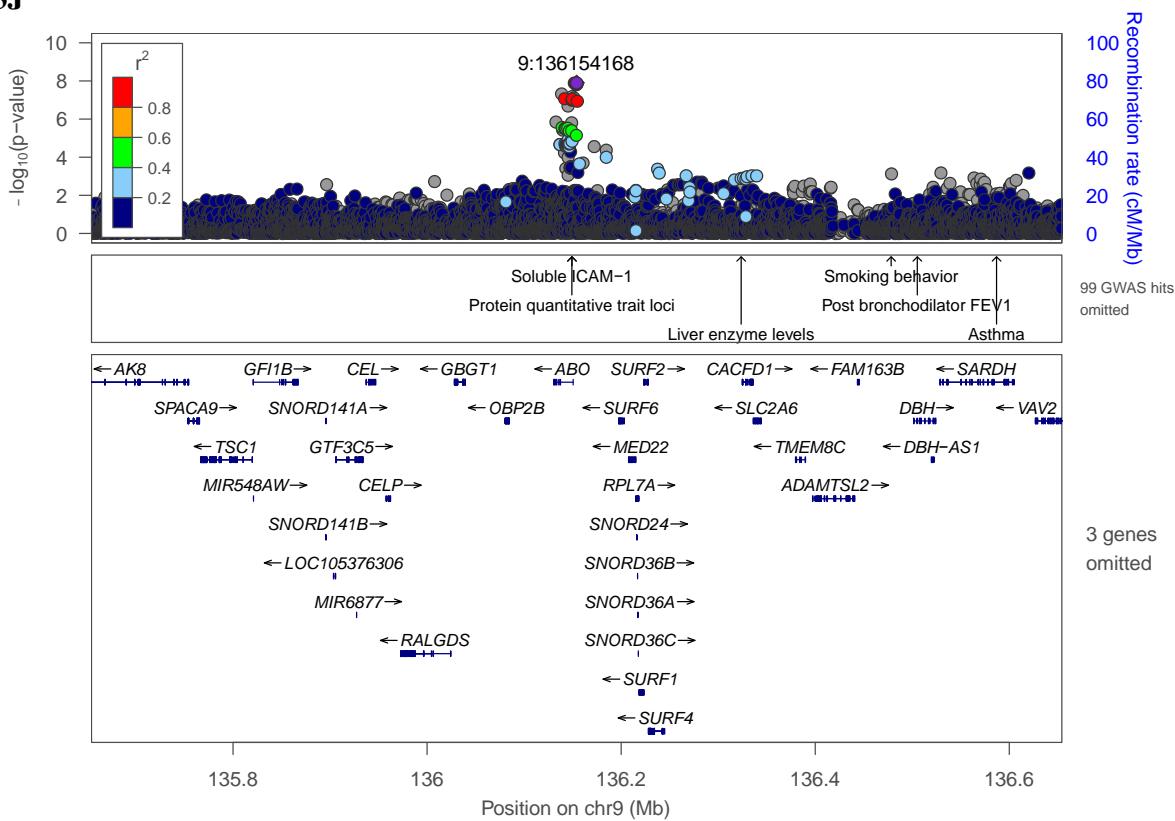



3K

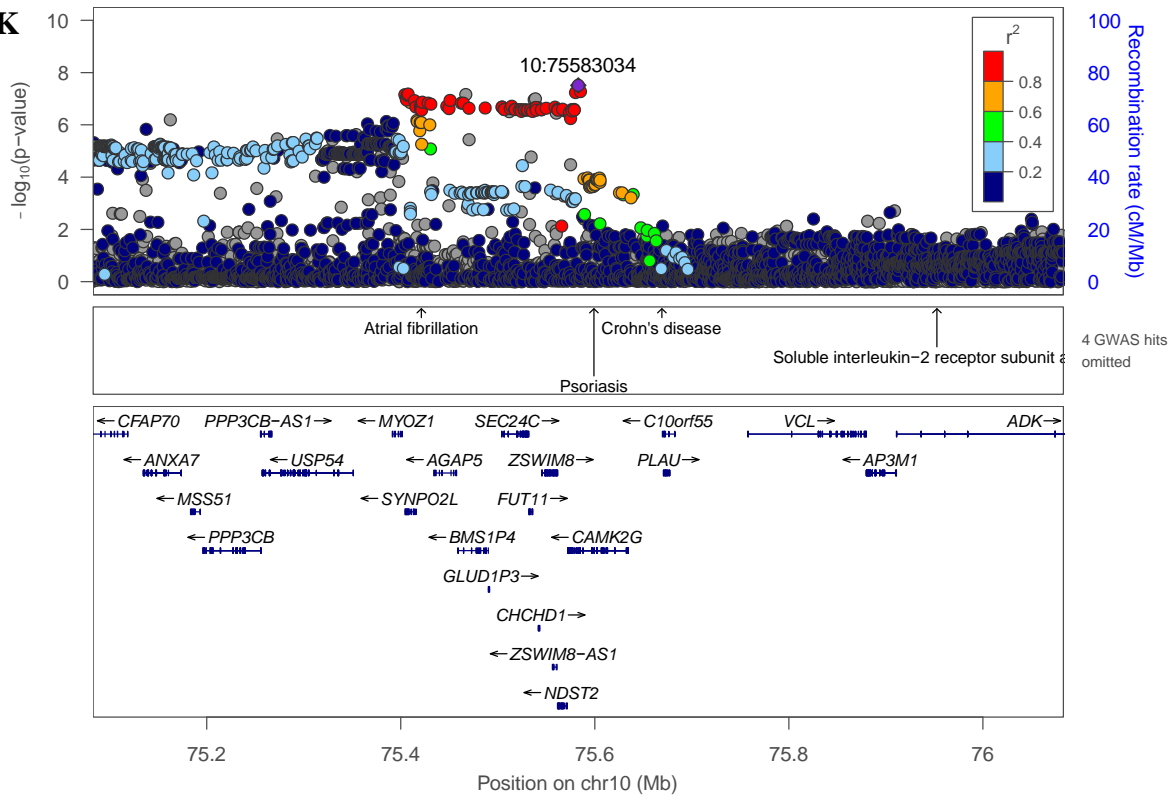

3L

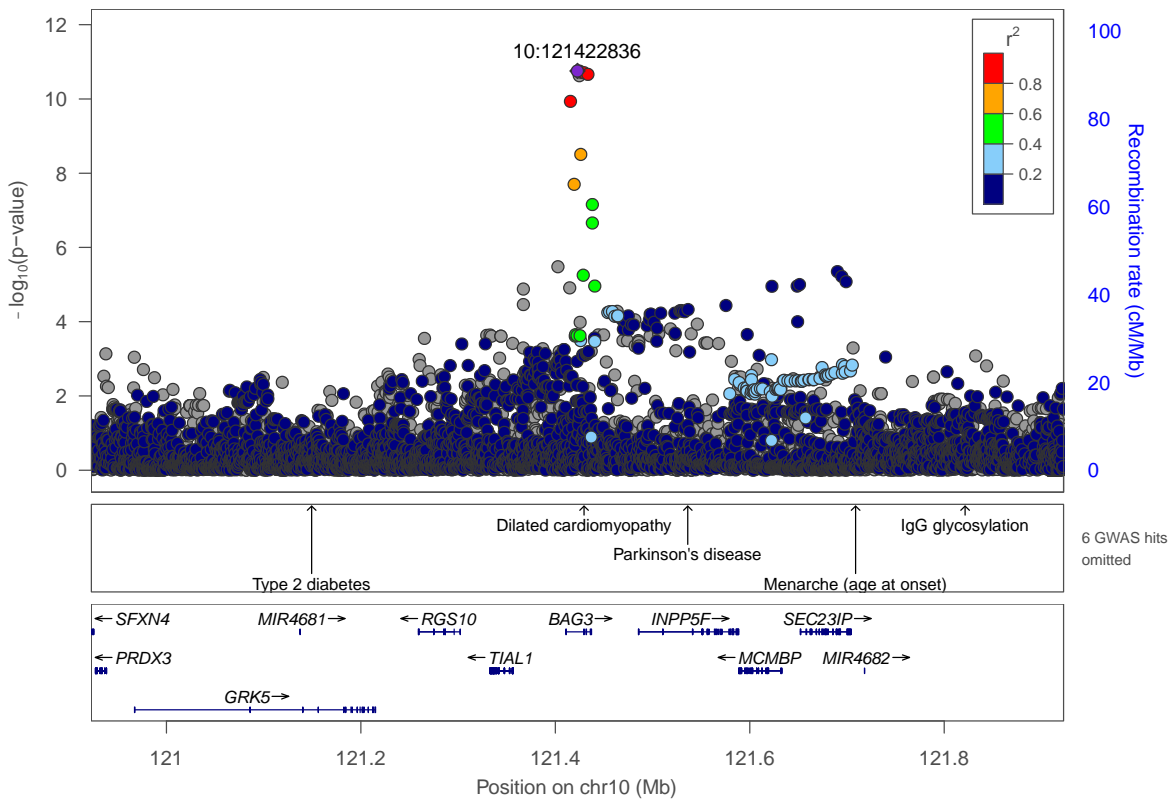

3M

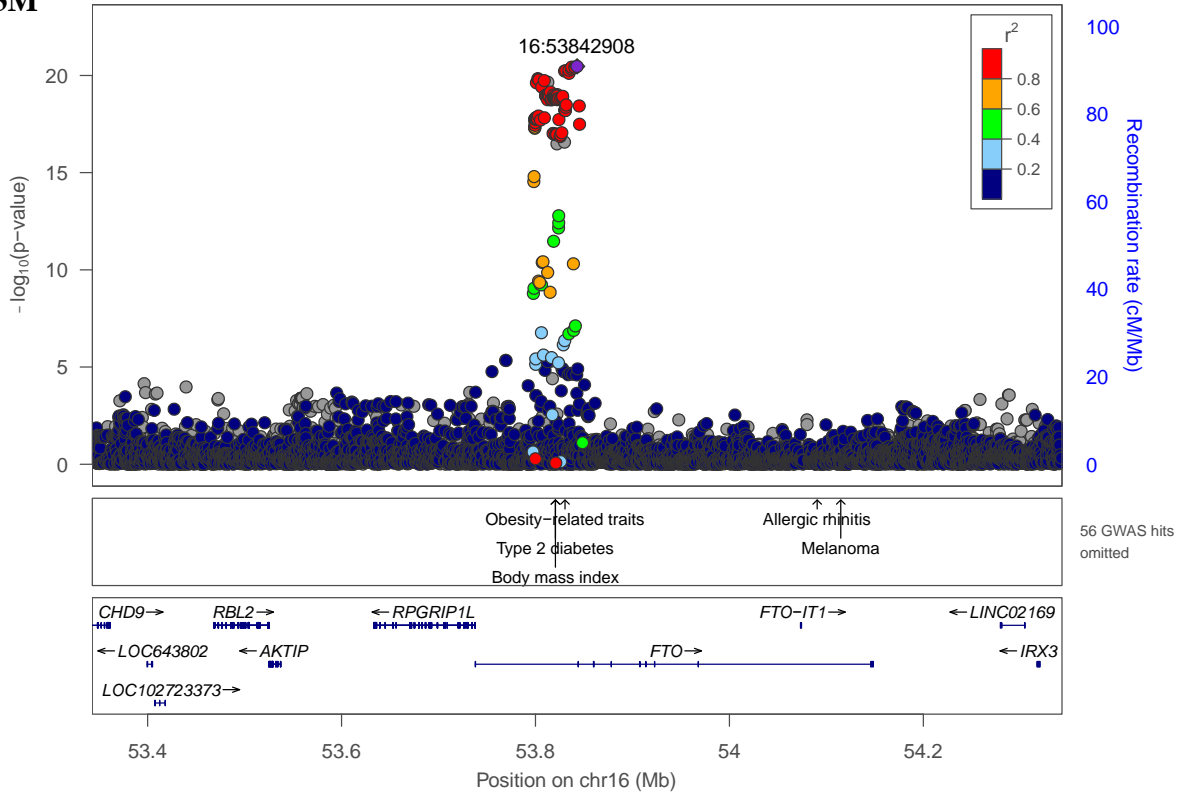

3N

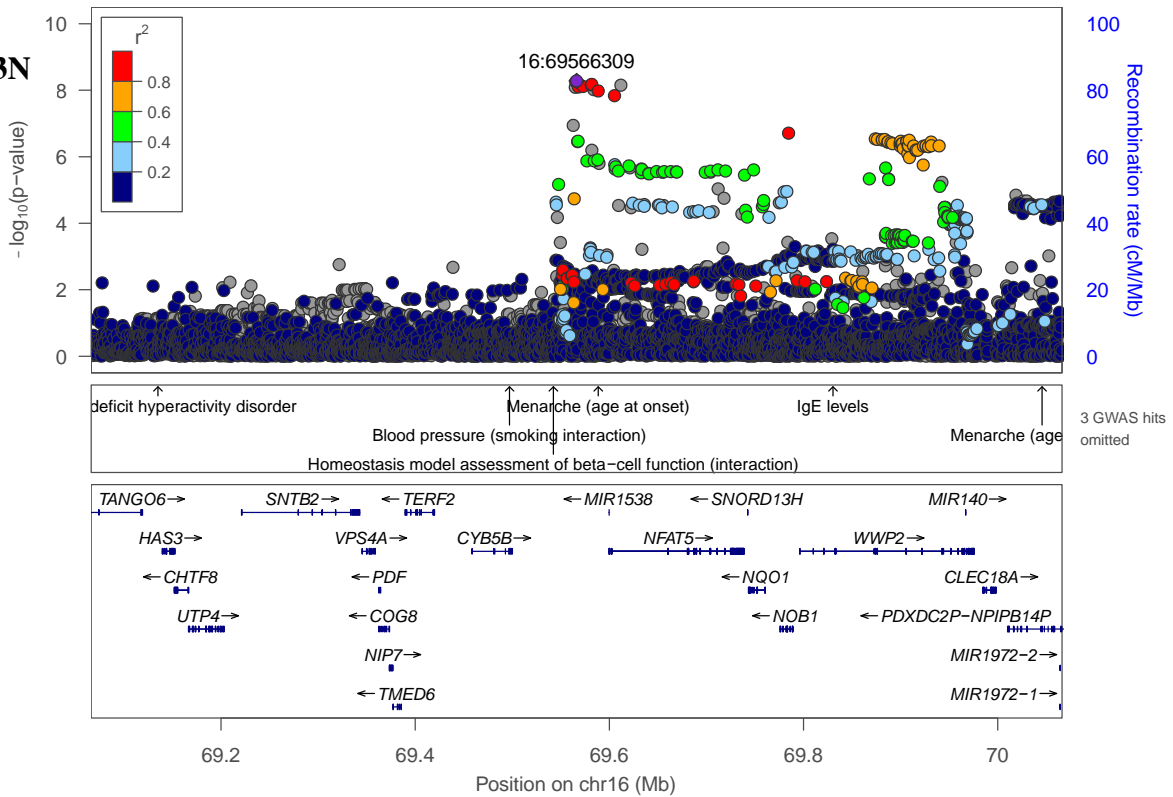

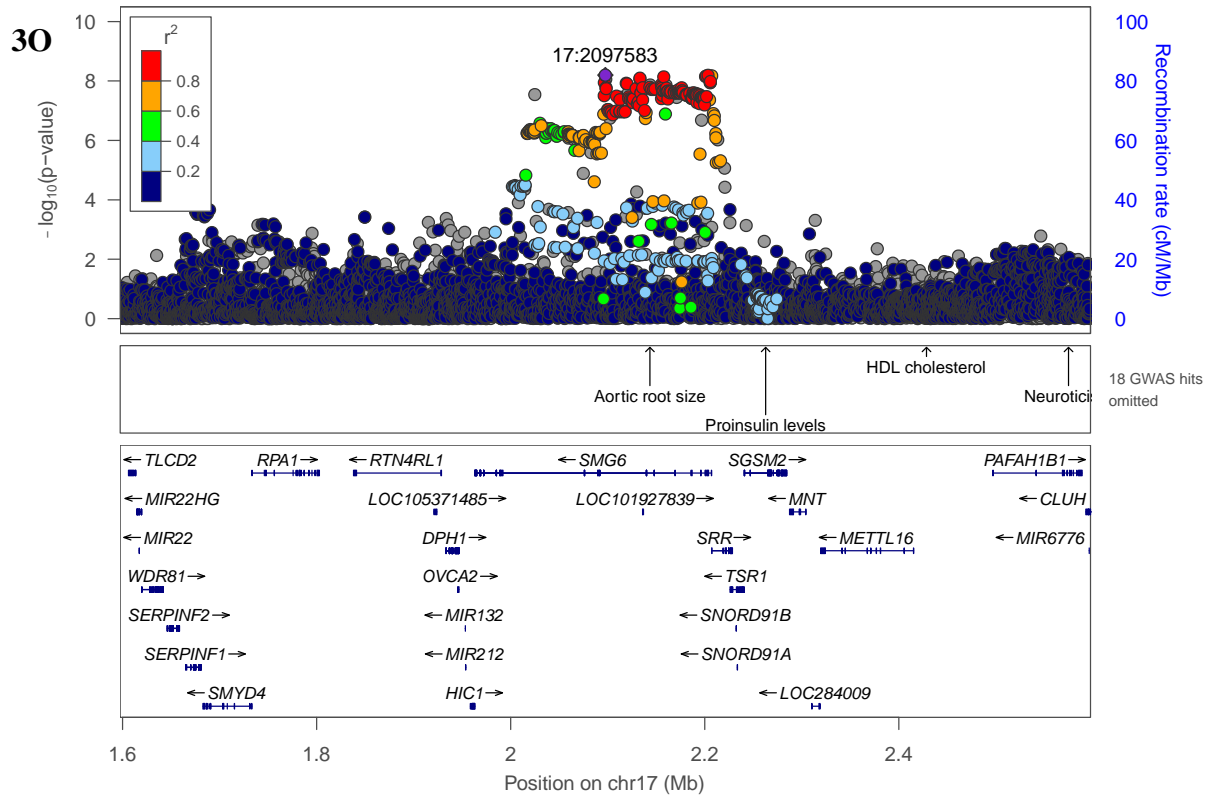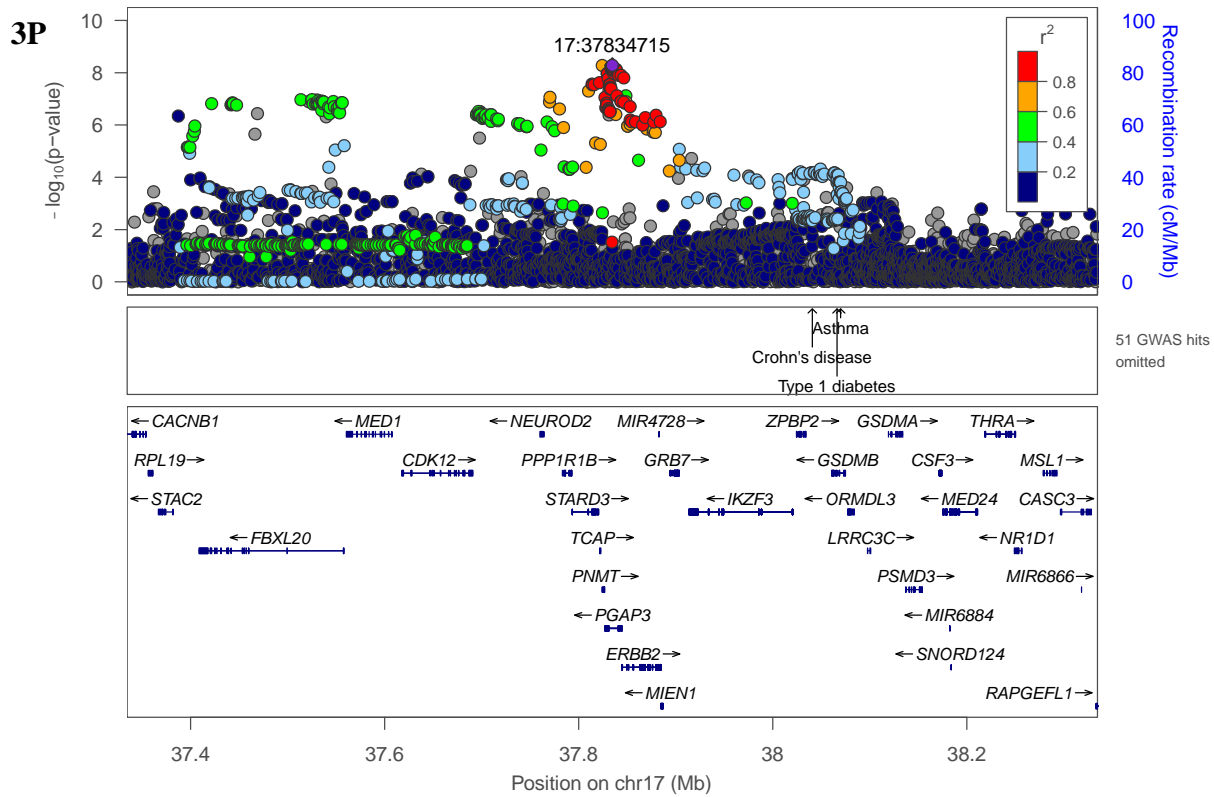

3Q

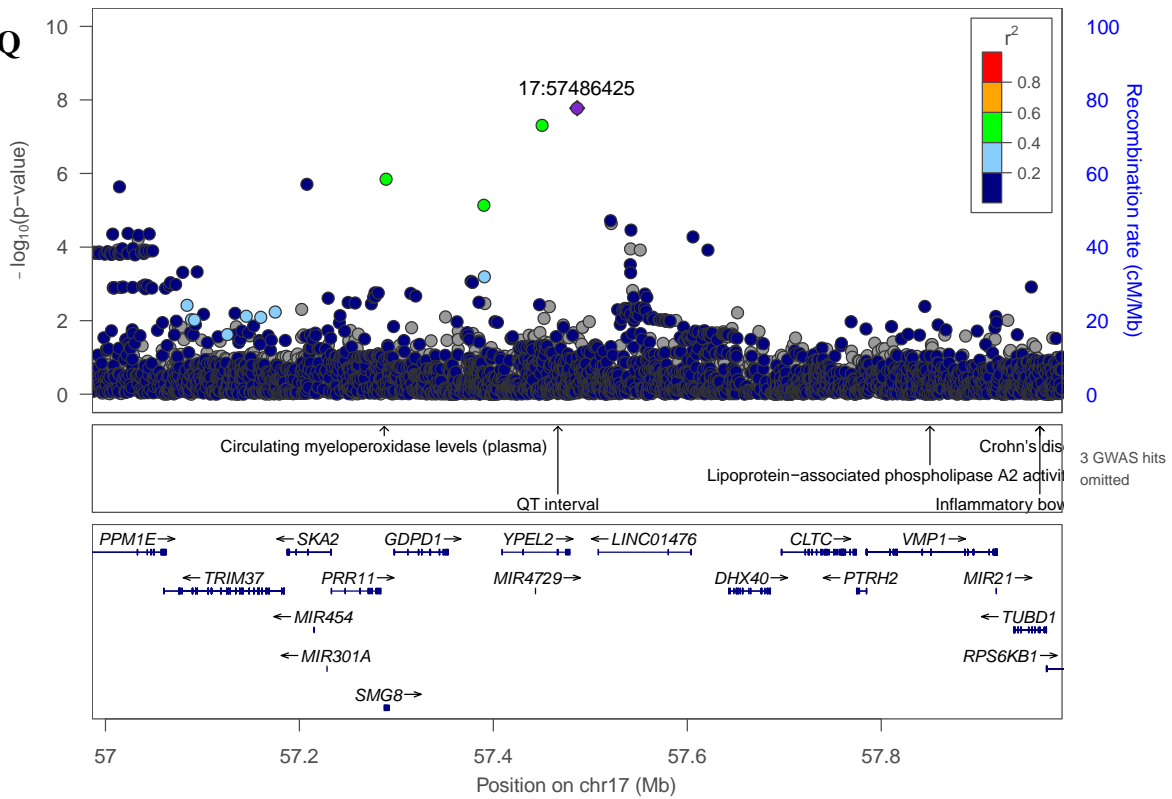

3R

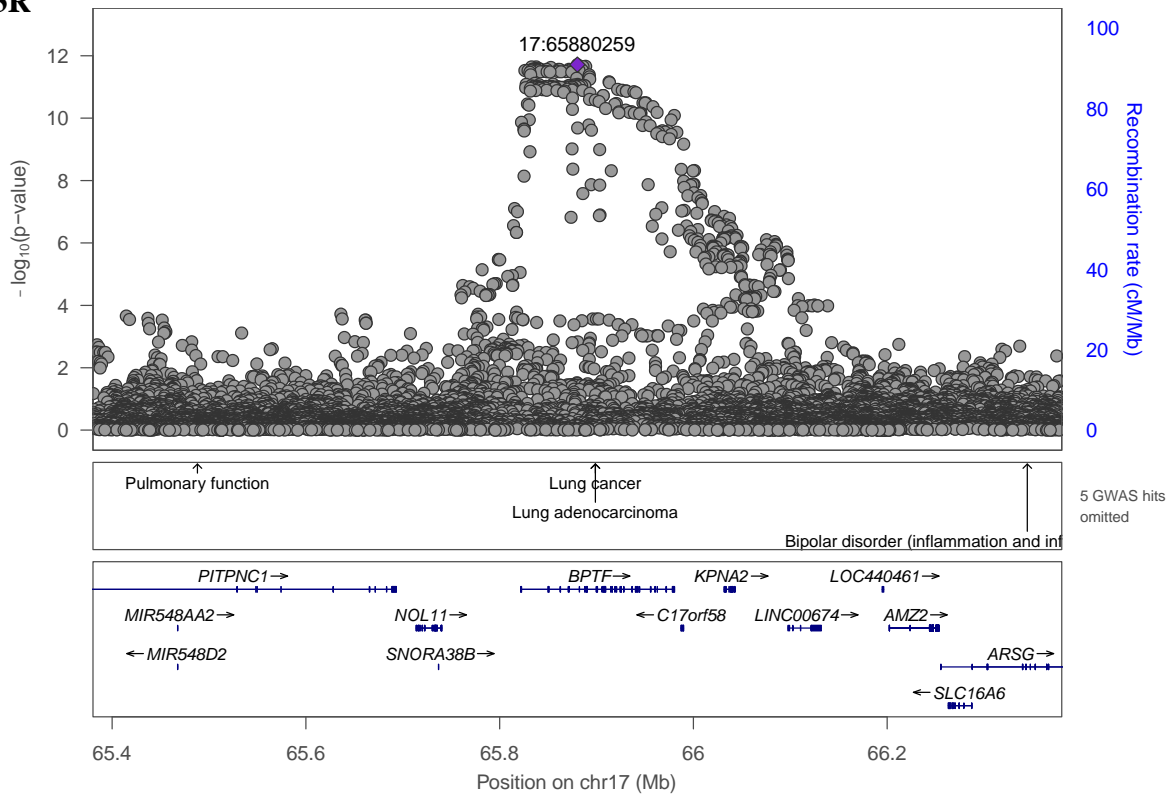

3S

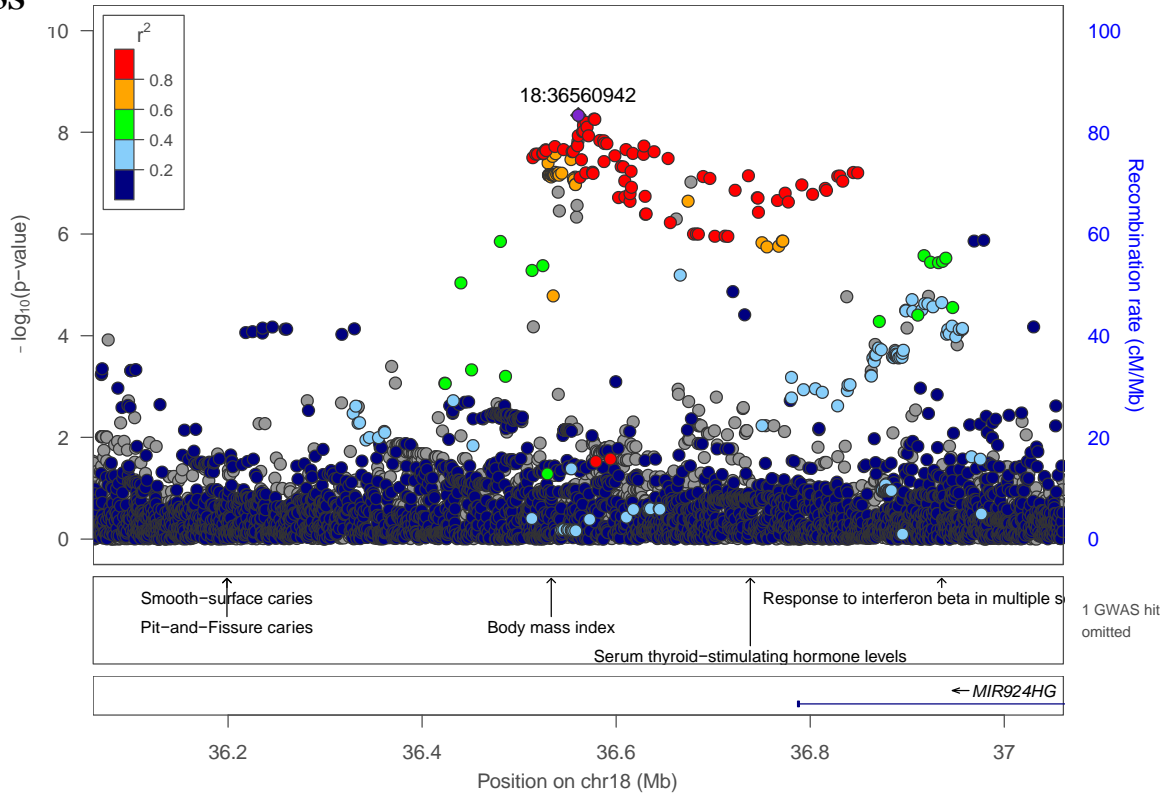

3T

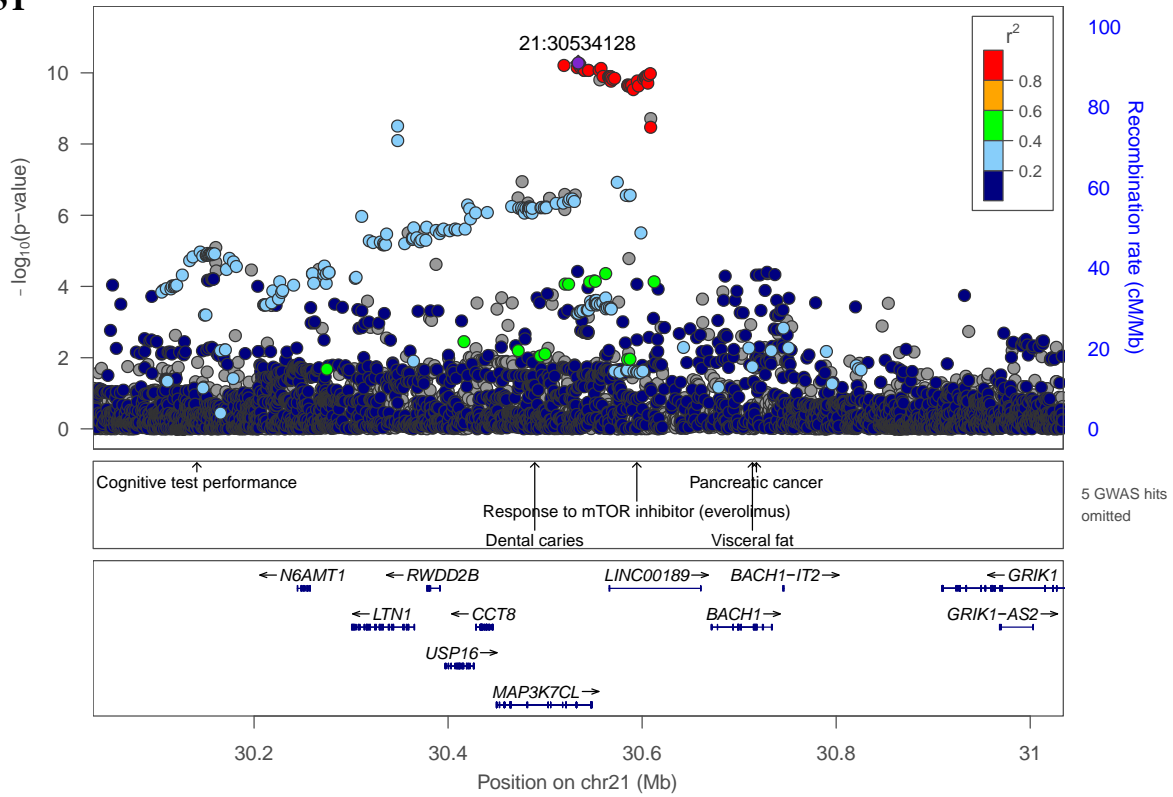

**Supplementary Figure 4.** Comparison of top HFpEF-associated between GWAS results from two HFpEF definitions - a more restrictive definition (n=12,119 cases) and the definition used for the primary HFpEF GWAS (n=19,598 cases).

Similar to the primary HFpEF GWAS, only one genome-wide significant locus (*FTO*) was identified. Using LDSC and the GWAS summary statistics, we found that the genetic correlation between the two HFpEF definitions was very high ( $r=0.981$ ,  $p<2\times 10^{-16}$ ). Among top 110 HFpEF-associated common SNPs ( $p<10^{-6}$ ,  $MAF>1\%$ ), the genetic effects between the two HFpEF GWAS were highly correlated ( $r=0.995$ ,  $p<2\times 10^{-16}$ ). Mostly driven by a larger number of HFpEF cases in the original definition (19,598 vs. 12,119), the p-values of 109 out of 110 SNPs were lower in the original HFpEF GWAS conducted in the less restrictive cohort. All tests were two-sided without adjustment for multiple comparisons.

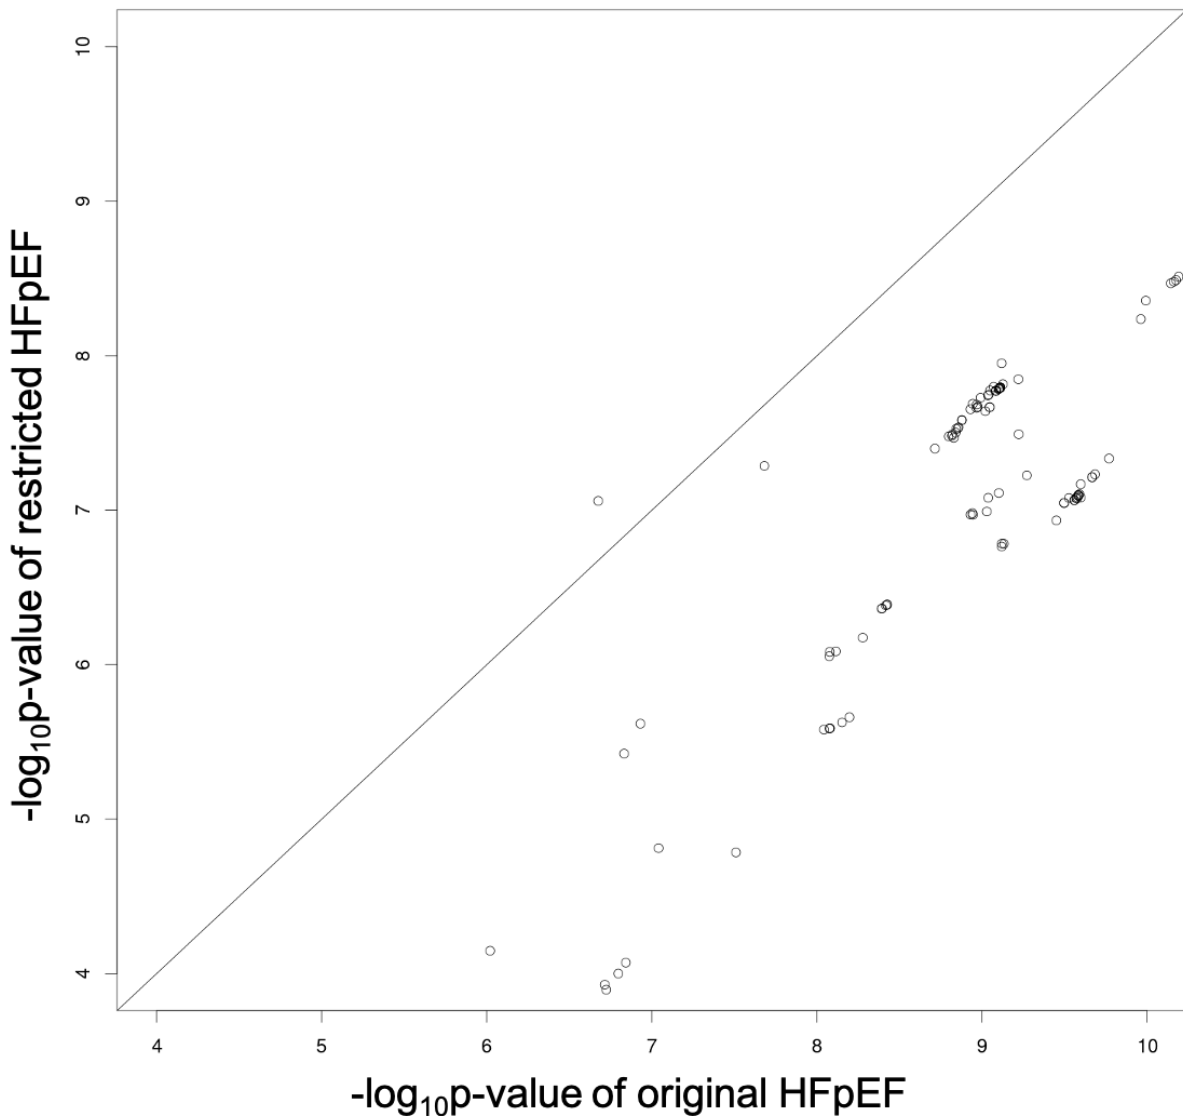

**Supplementary Figure 5A.** Quantile-quantile plot of genome-wide association study of heart failure with reduced ejection fraction (HFrEF).

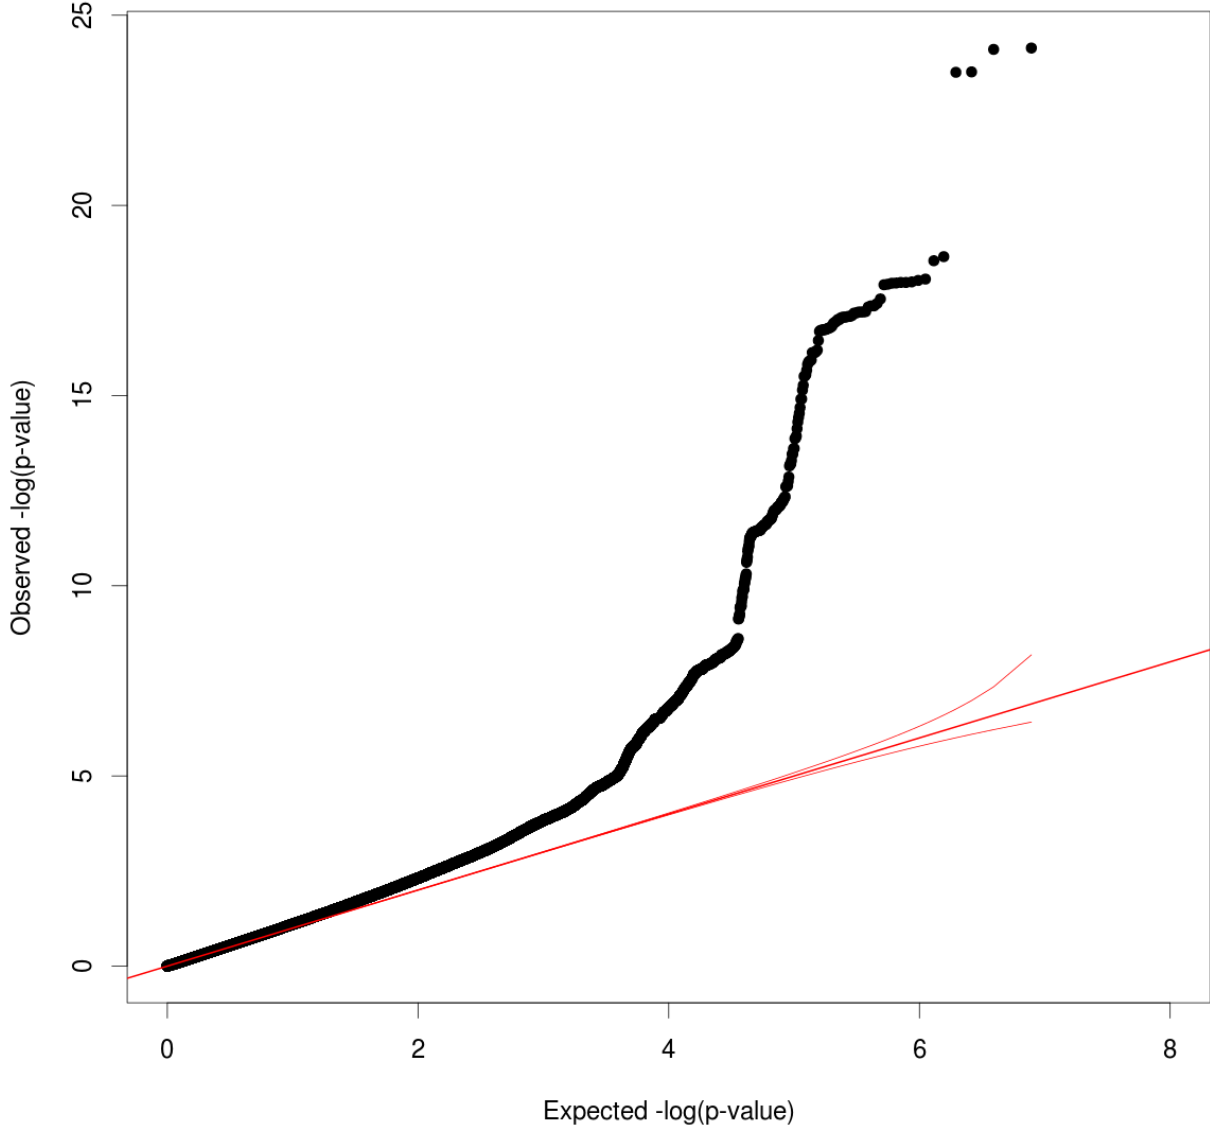

**Supplementary Figure 5B.** Quantile-quantile plot of genome-wide association study of heart failure with preserved ejection fraction (HFpEF).

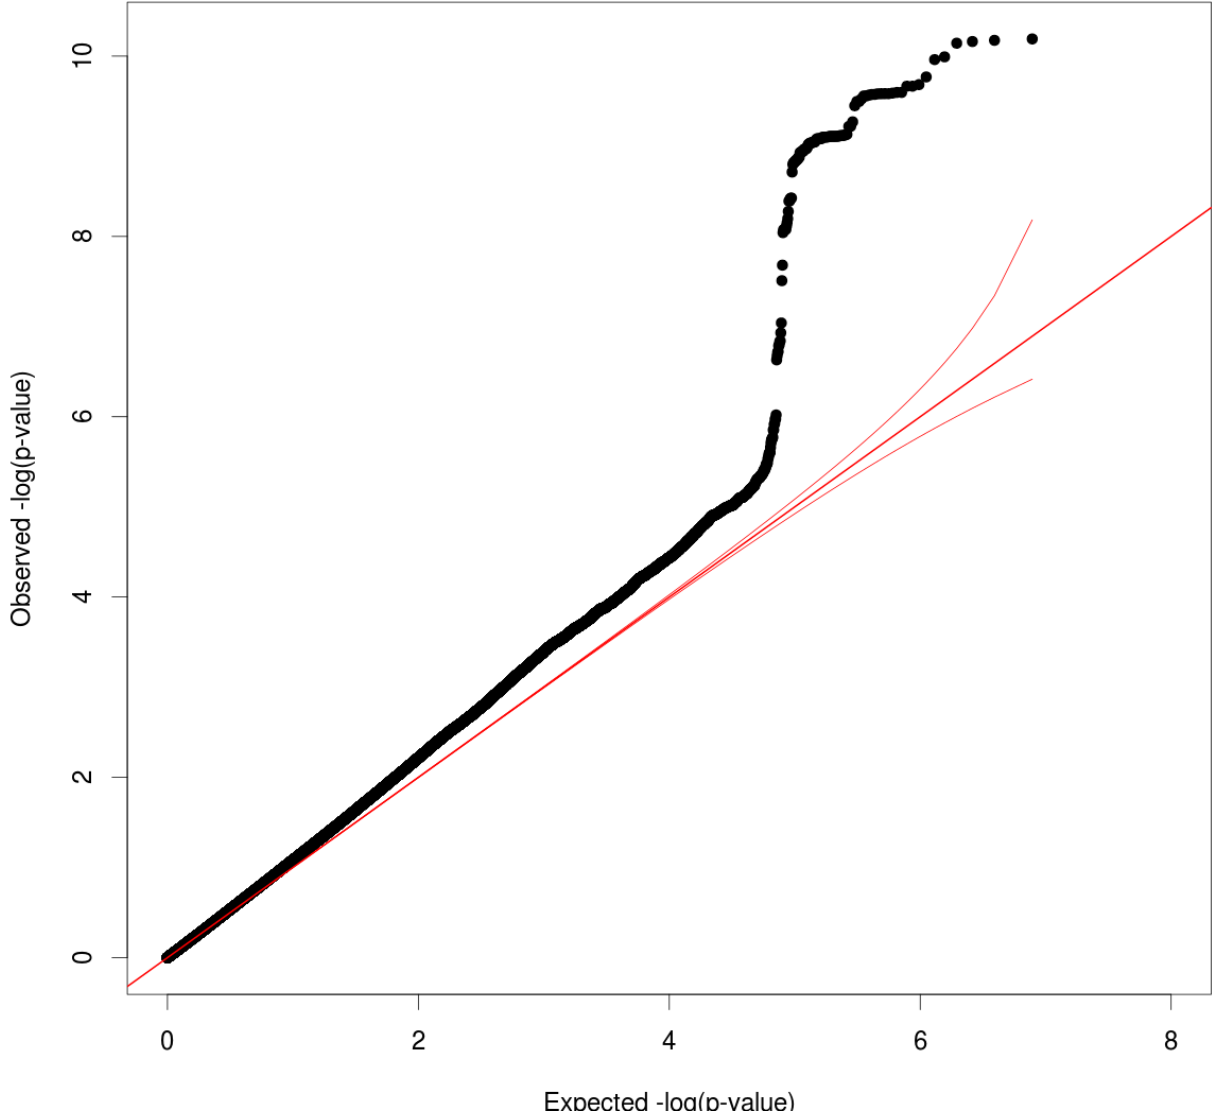



Supplementary Figure 6 A-M. Genome-wide significant loci associated with HFrEF/HFpEF

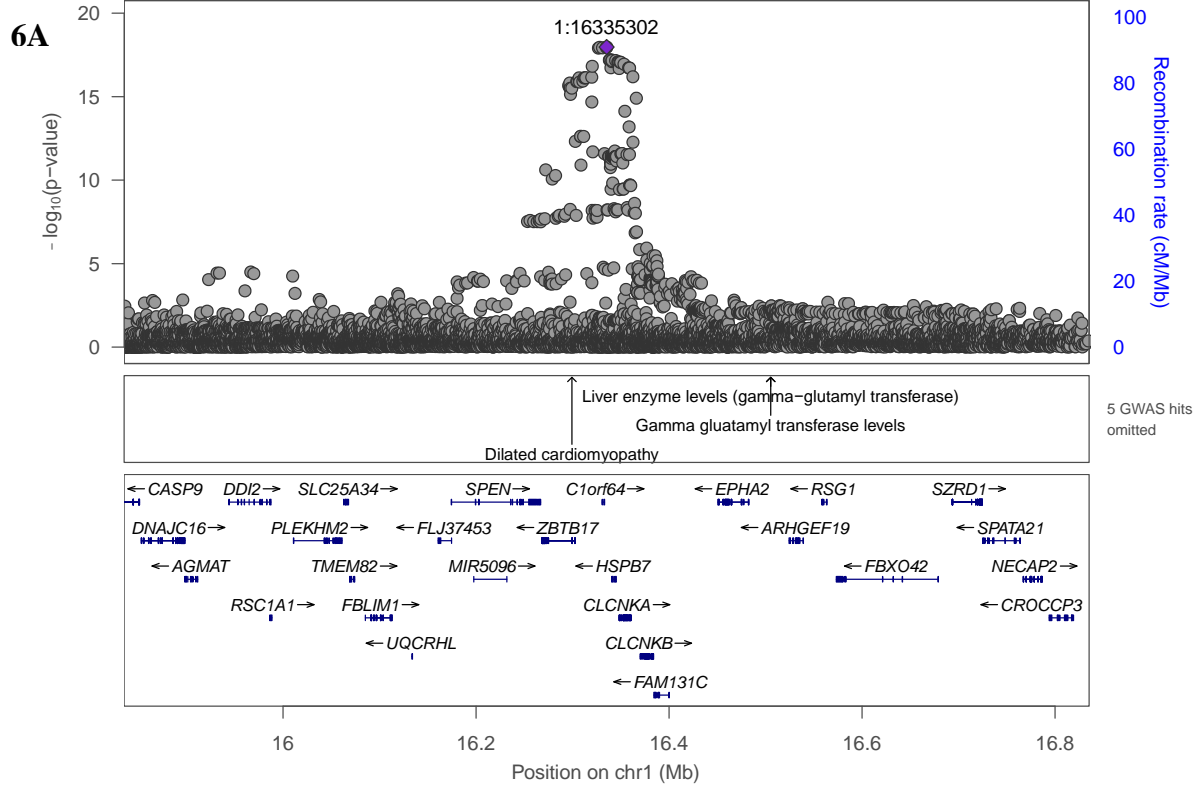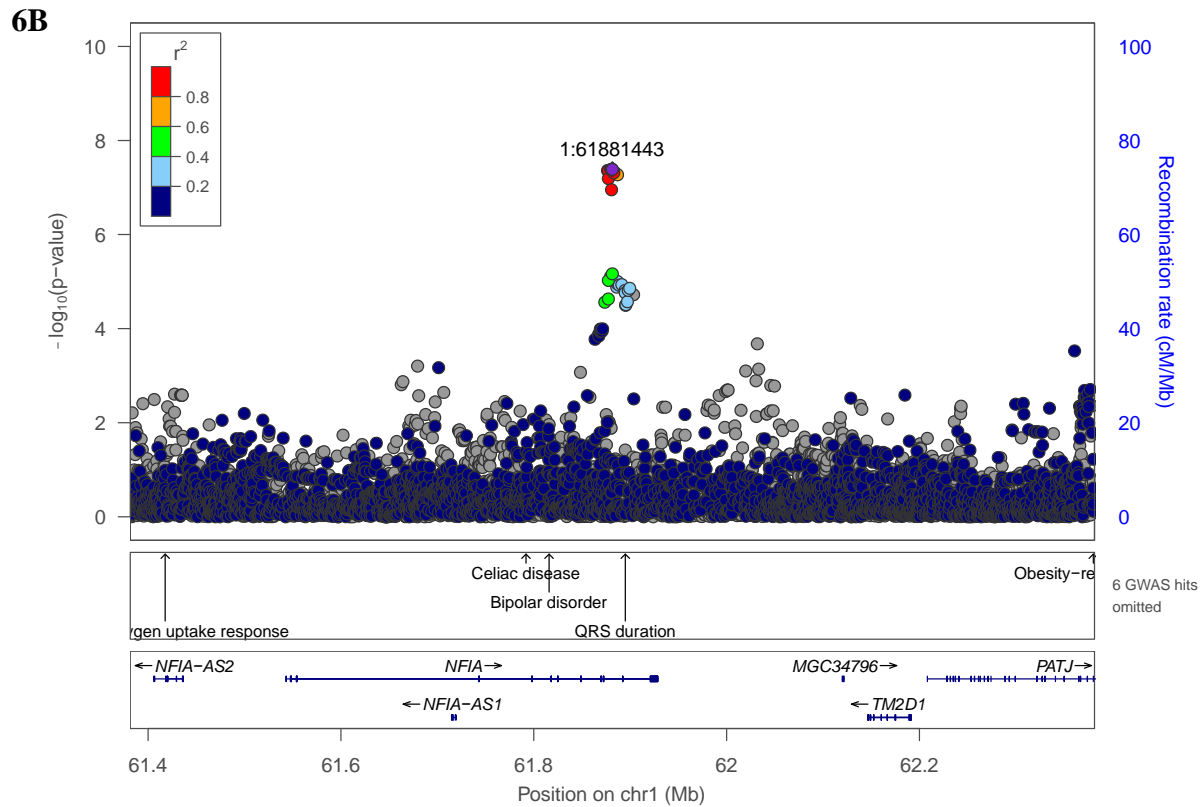

**6C**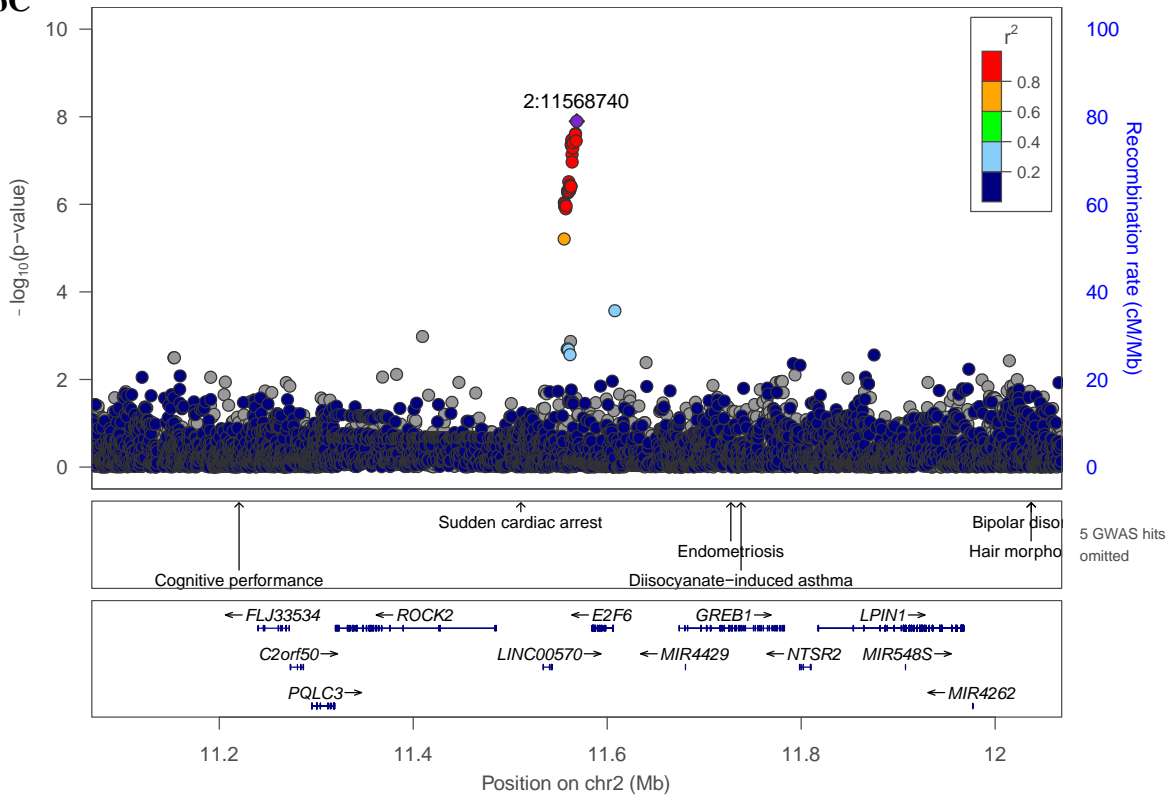**6D**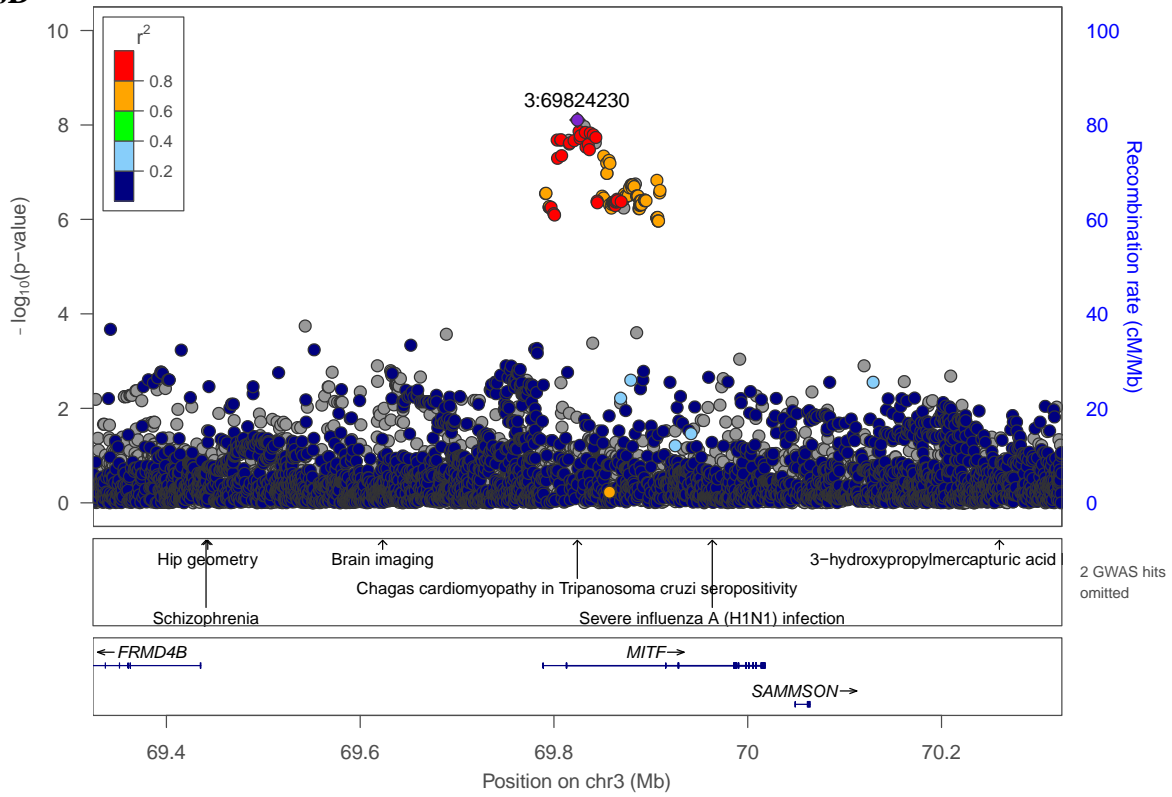

6E

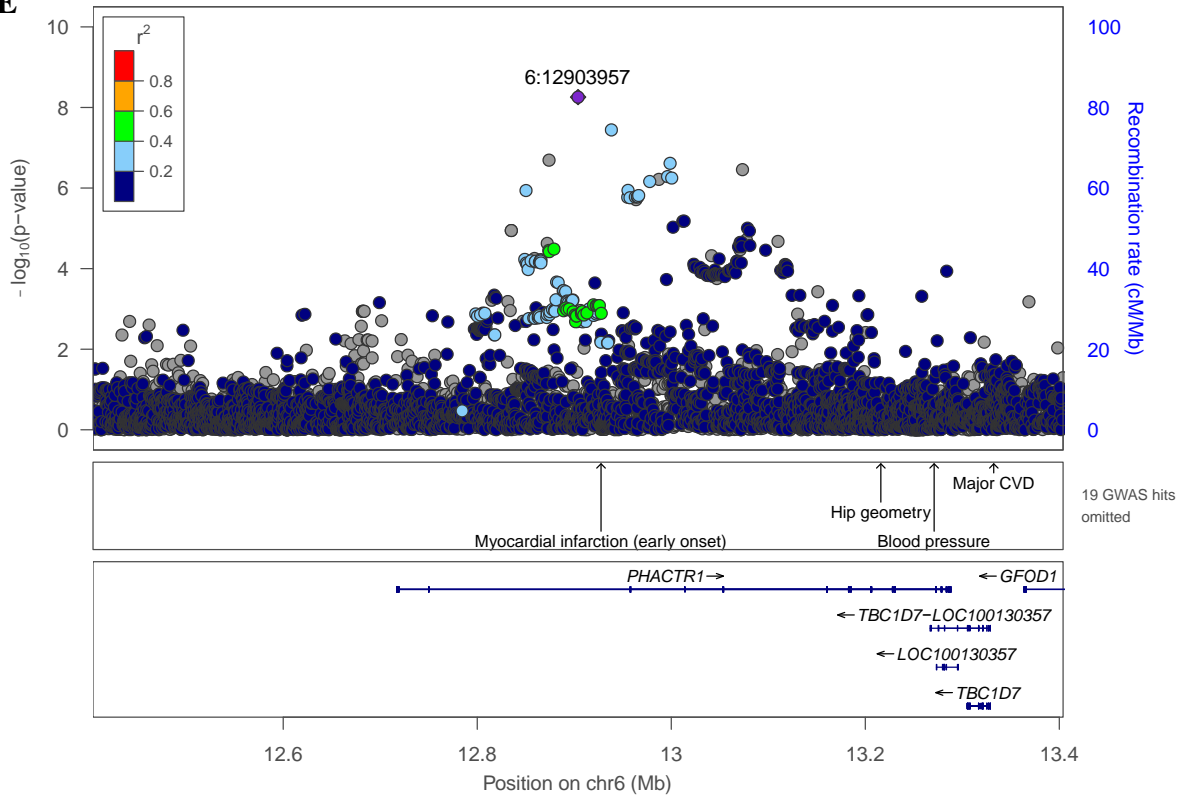

6F

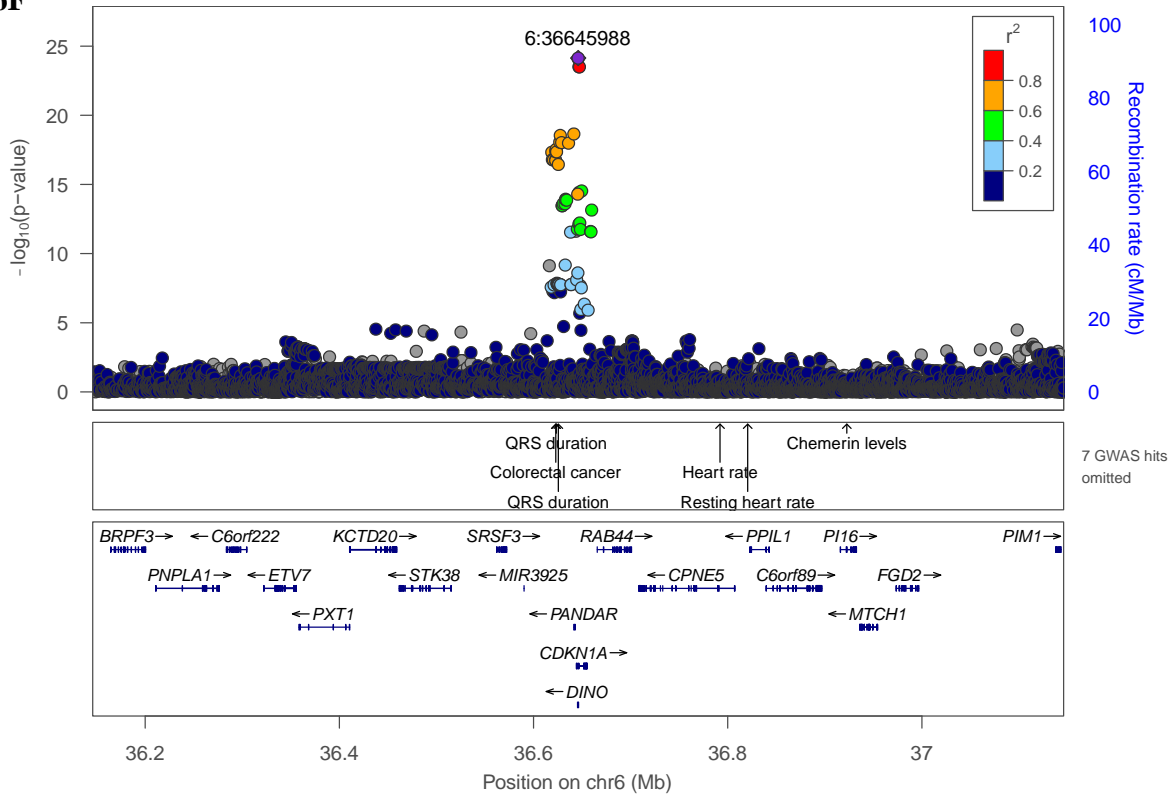

**6G**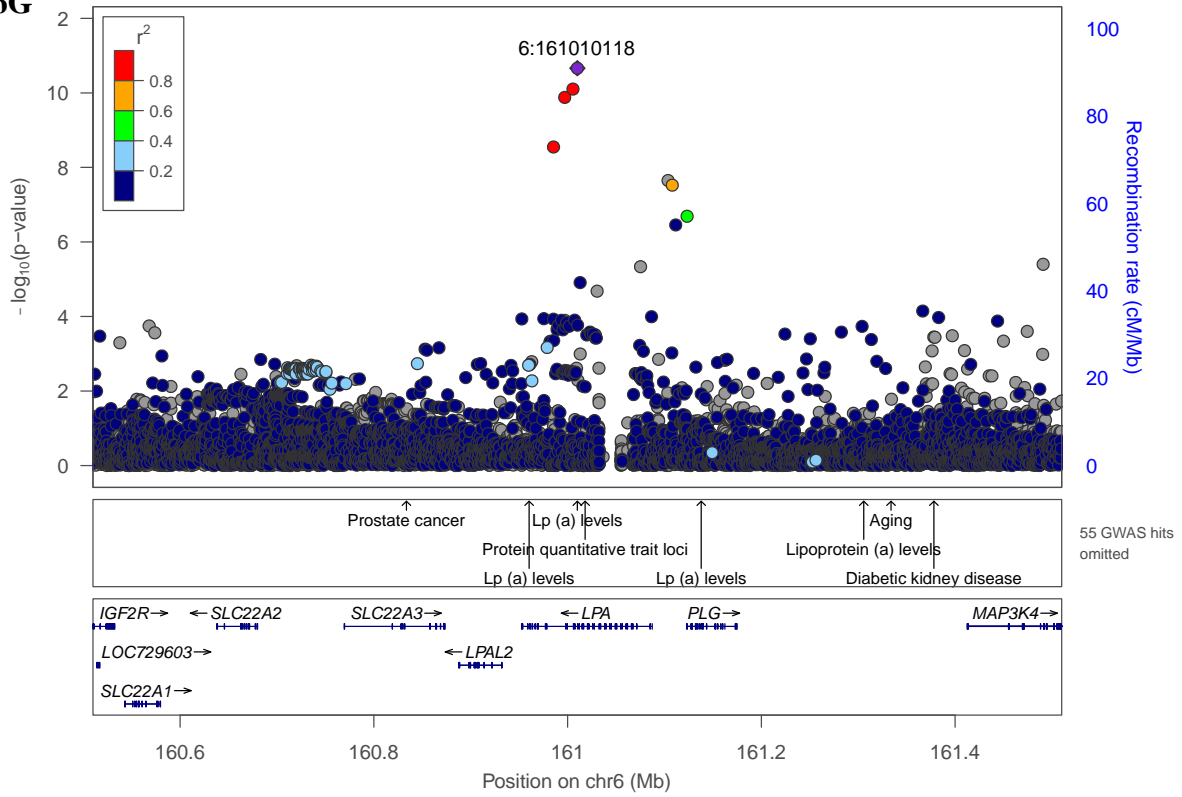**6H**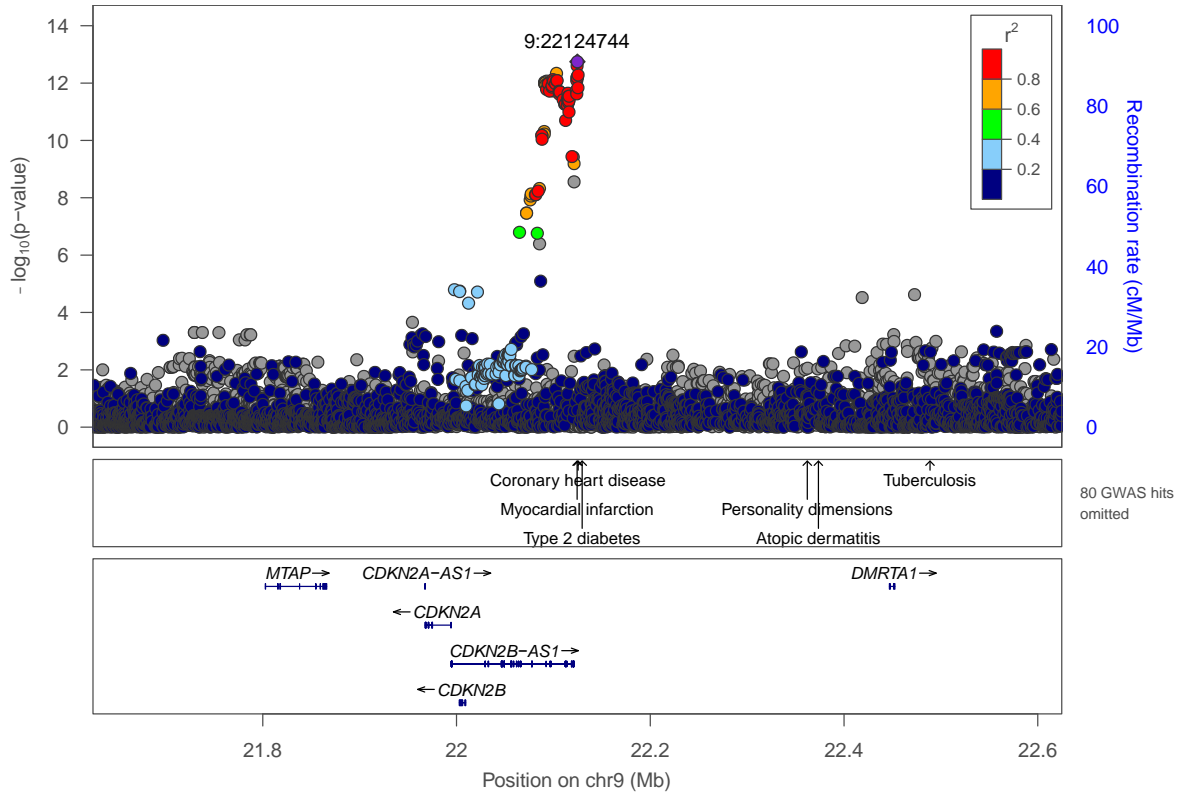

6I

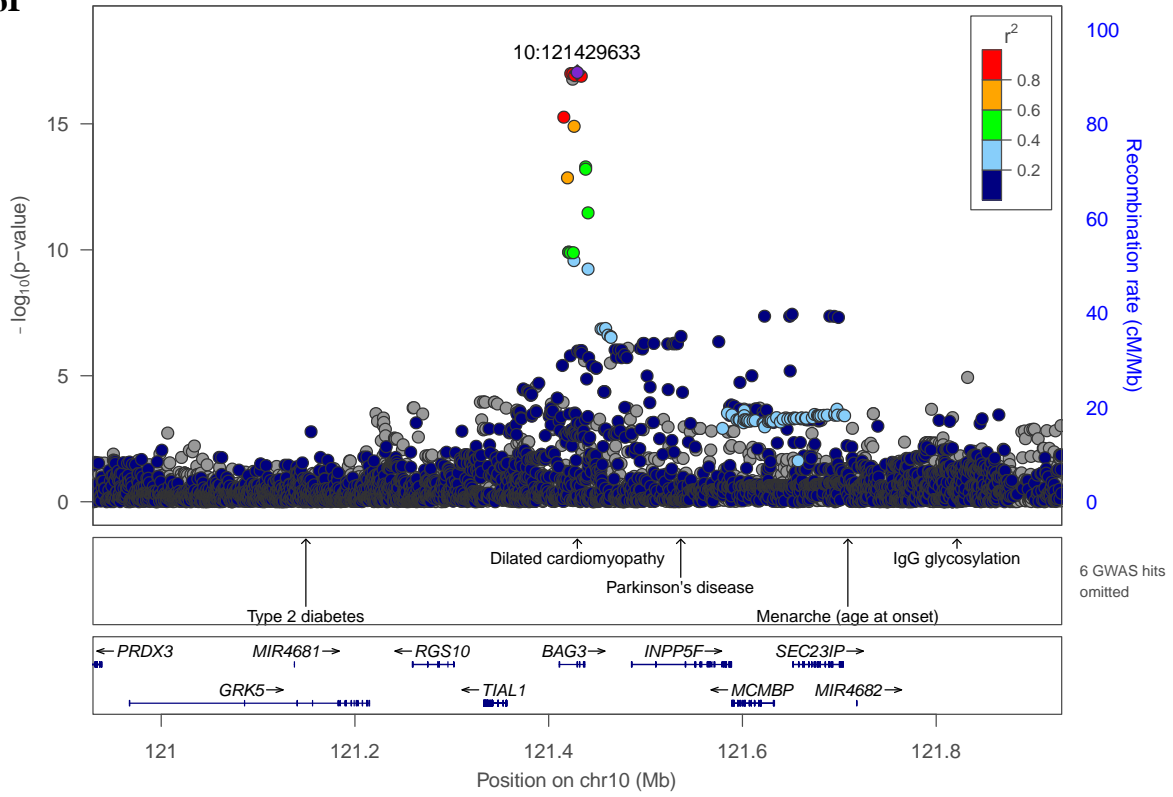

6J

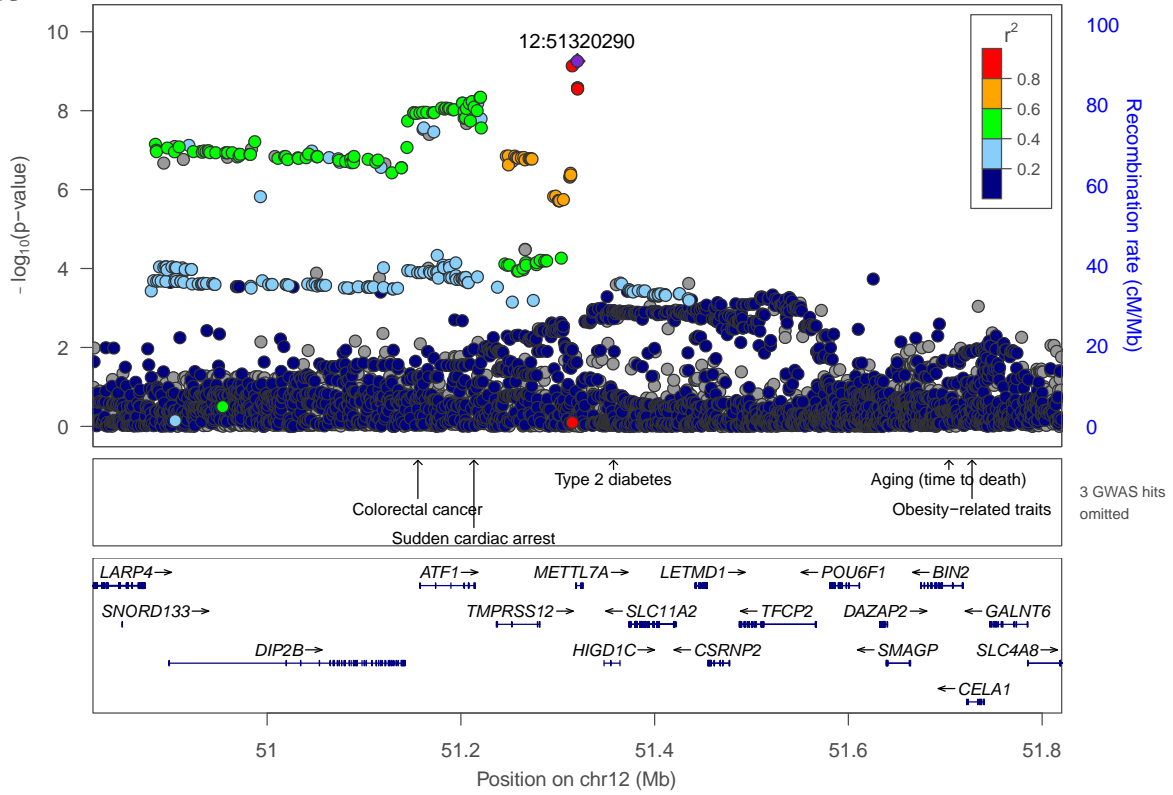

6K

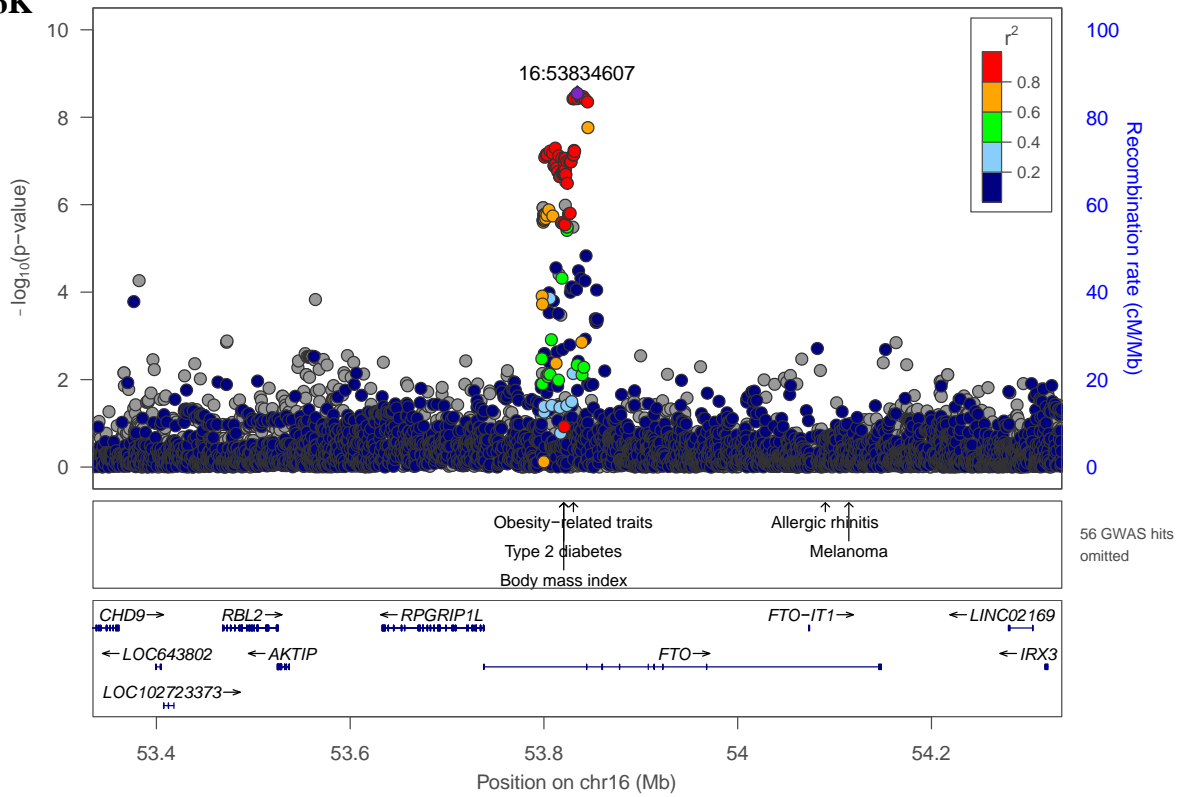

6L

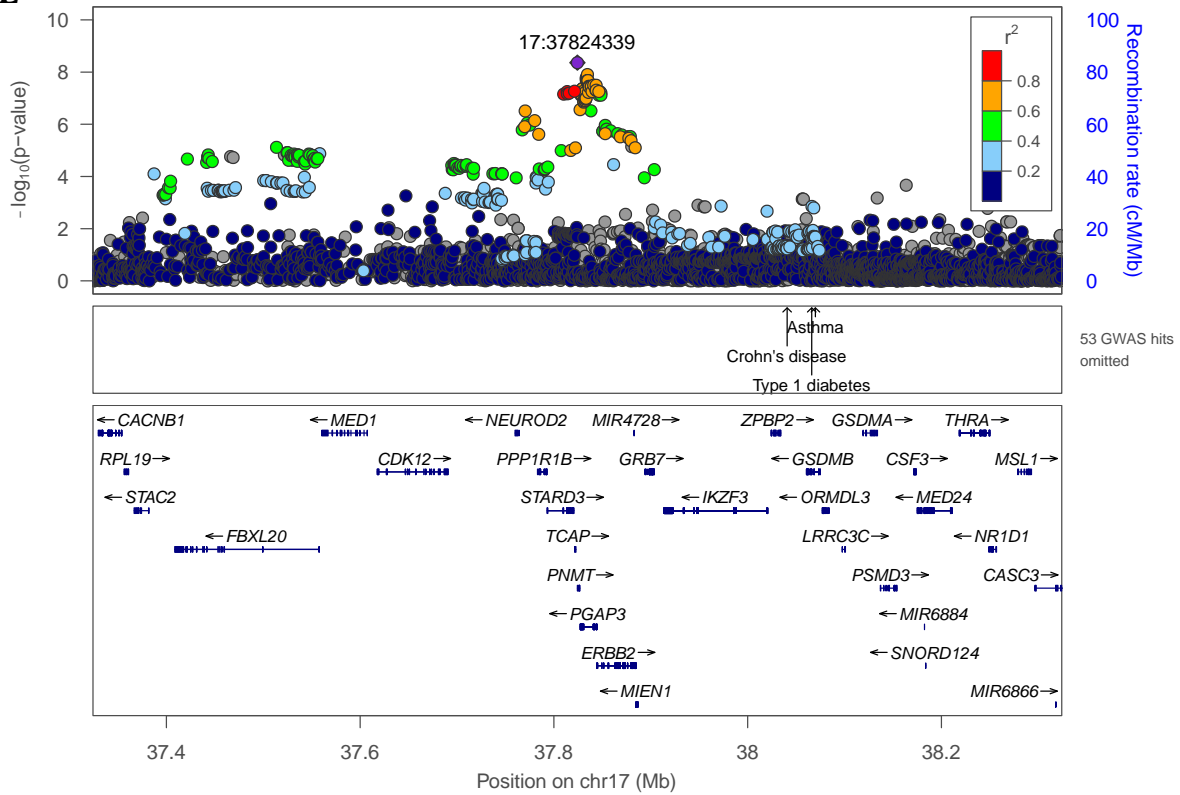

6M

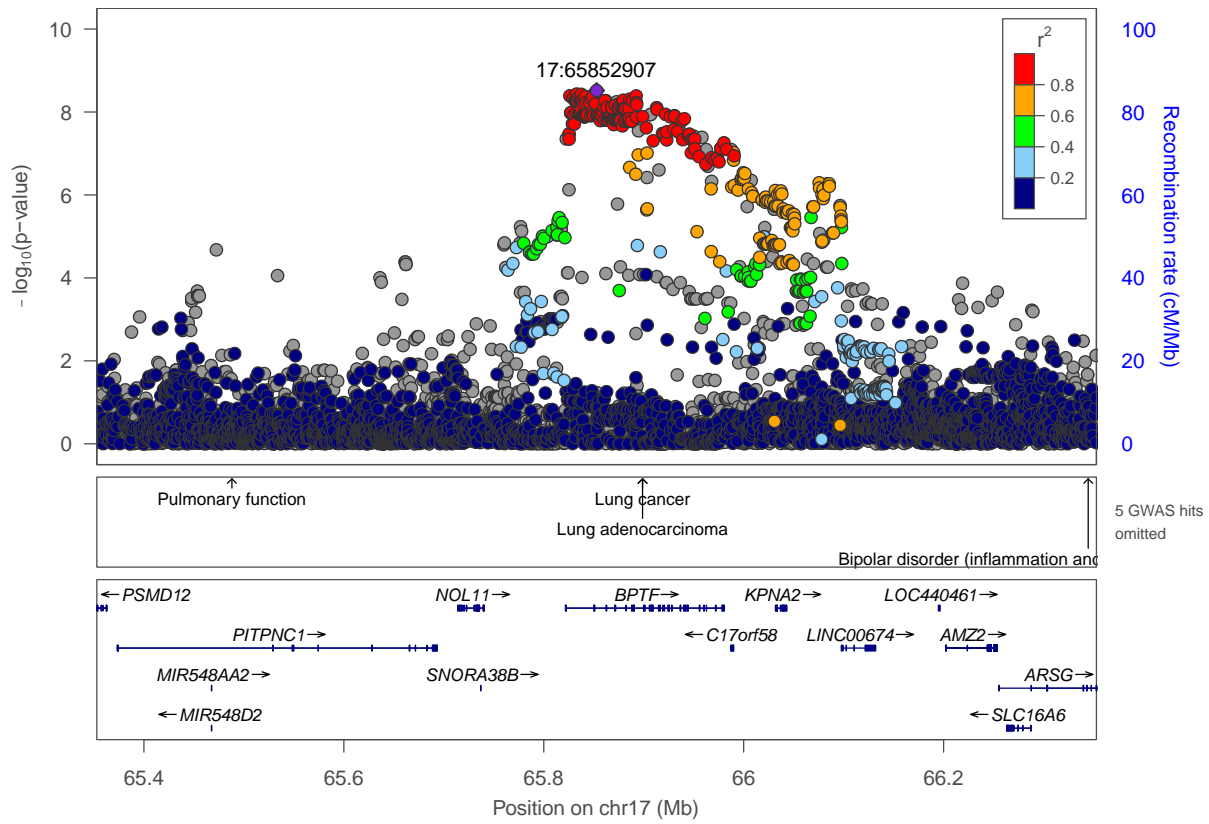

Supplementary Figure 6N. Genome-wide significant locus associated with HFpEF

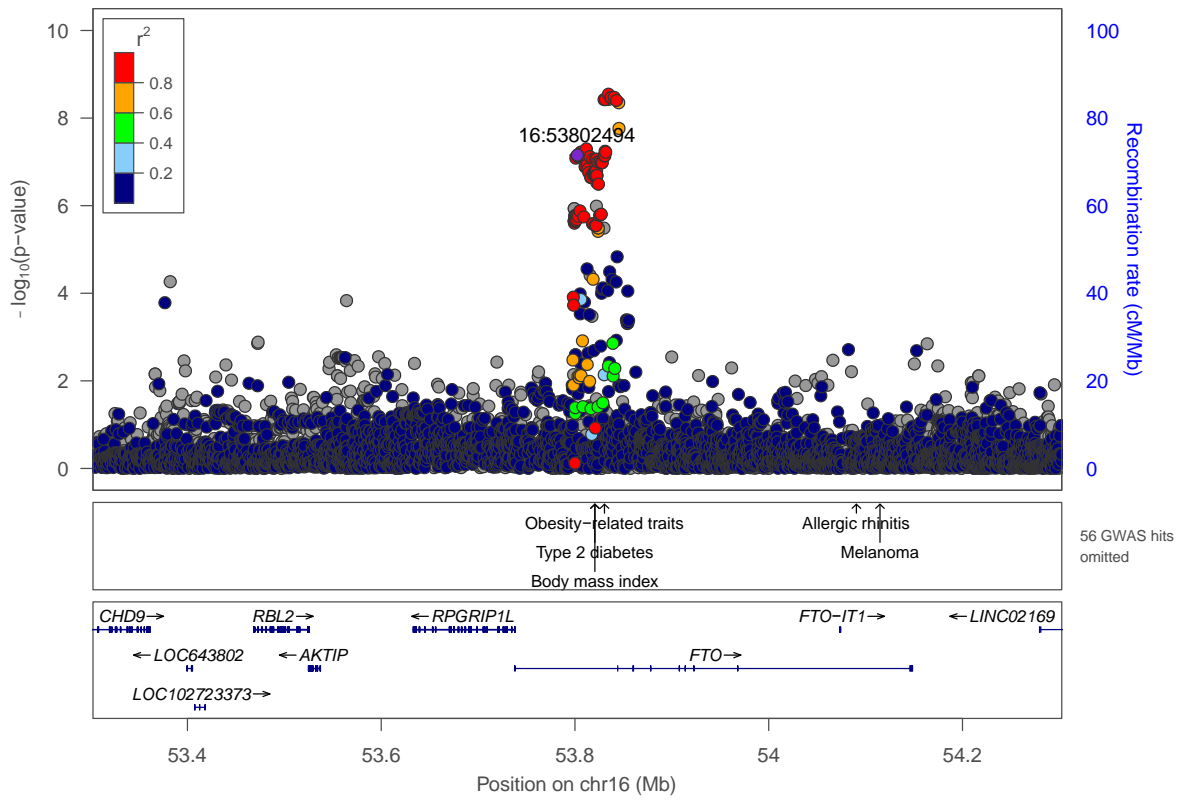



**Supplementary Figure 7.** Comparison in effect size for the genome-wide significant loci between HFrEF and HFpEF, with error bars for standard errors of HFrEF on the X axis and HFpEF on the Y axis.

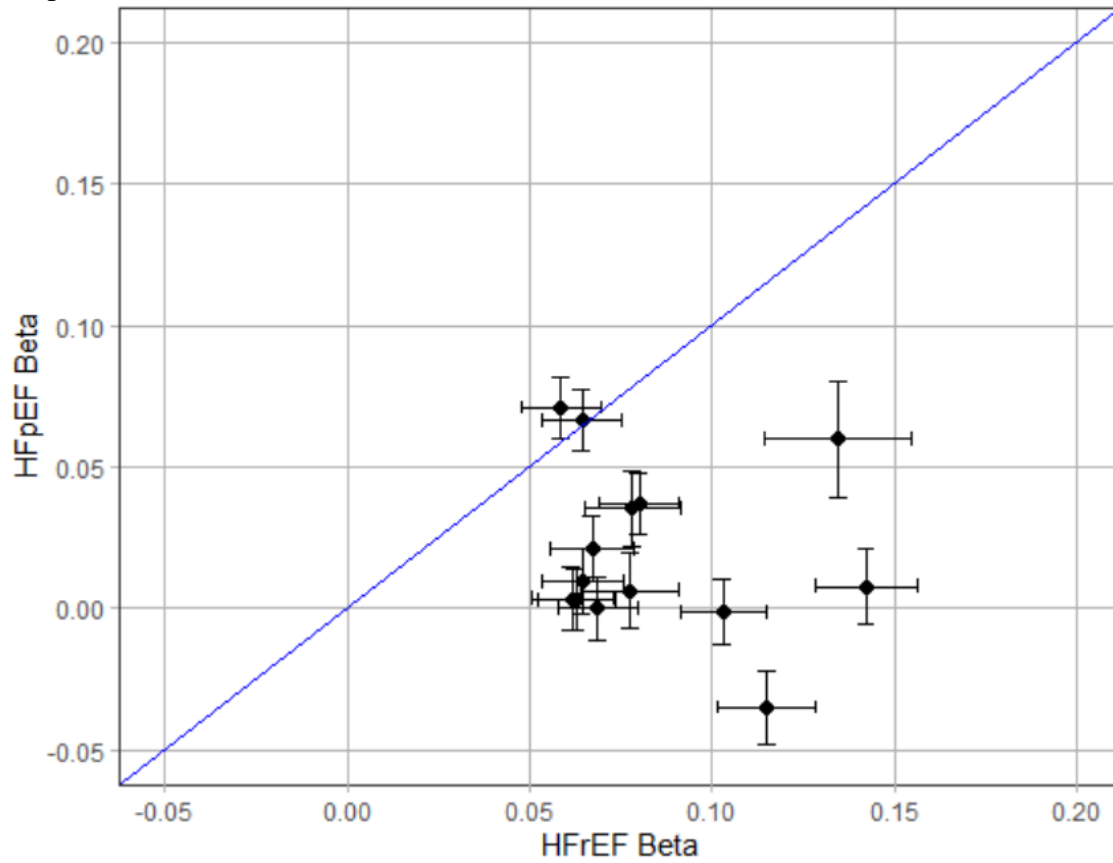

**Supplementary Figure 8.** Genetic associations of HF<sub>r</sub>EF in the *TMEM43* region.

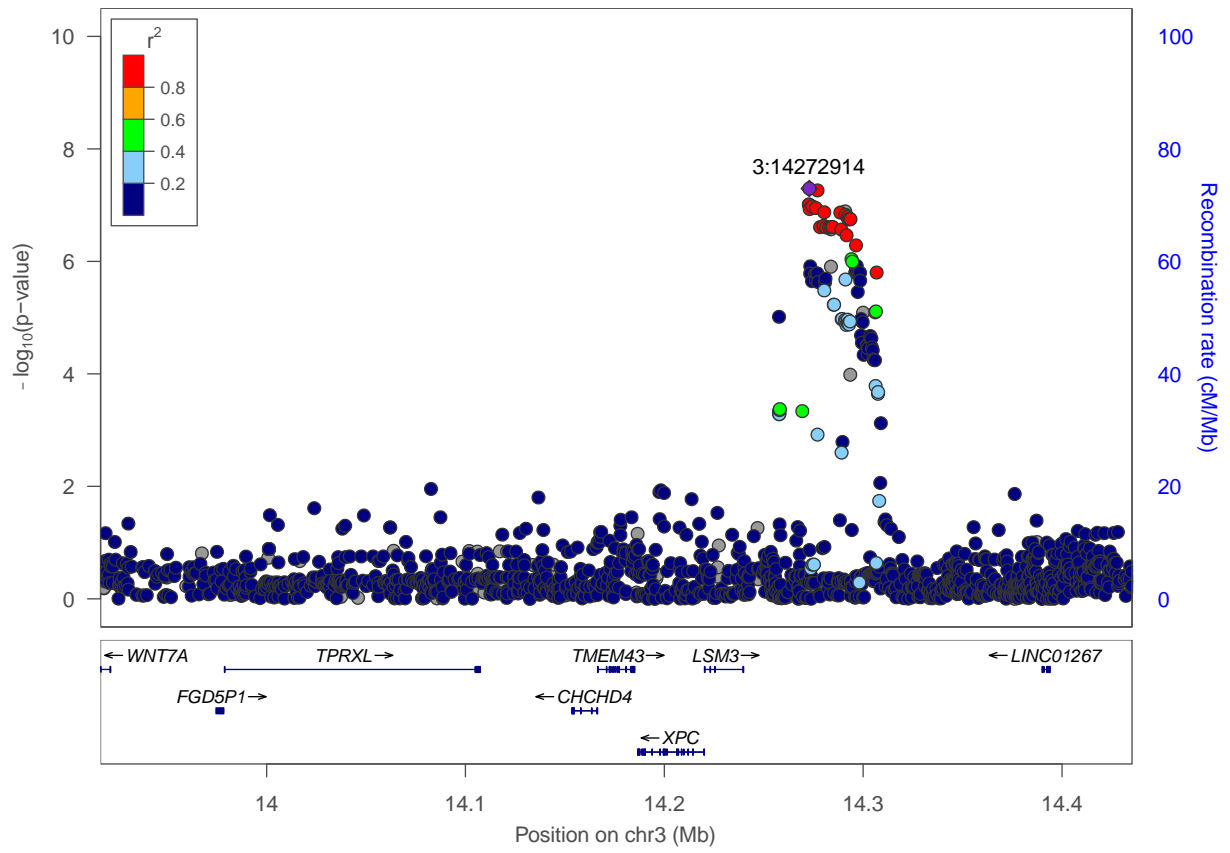

**Supplementary Figure 9.** SNP-based heritability using GREML-LDMS-I in MVP non-Hispanic Whites.

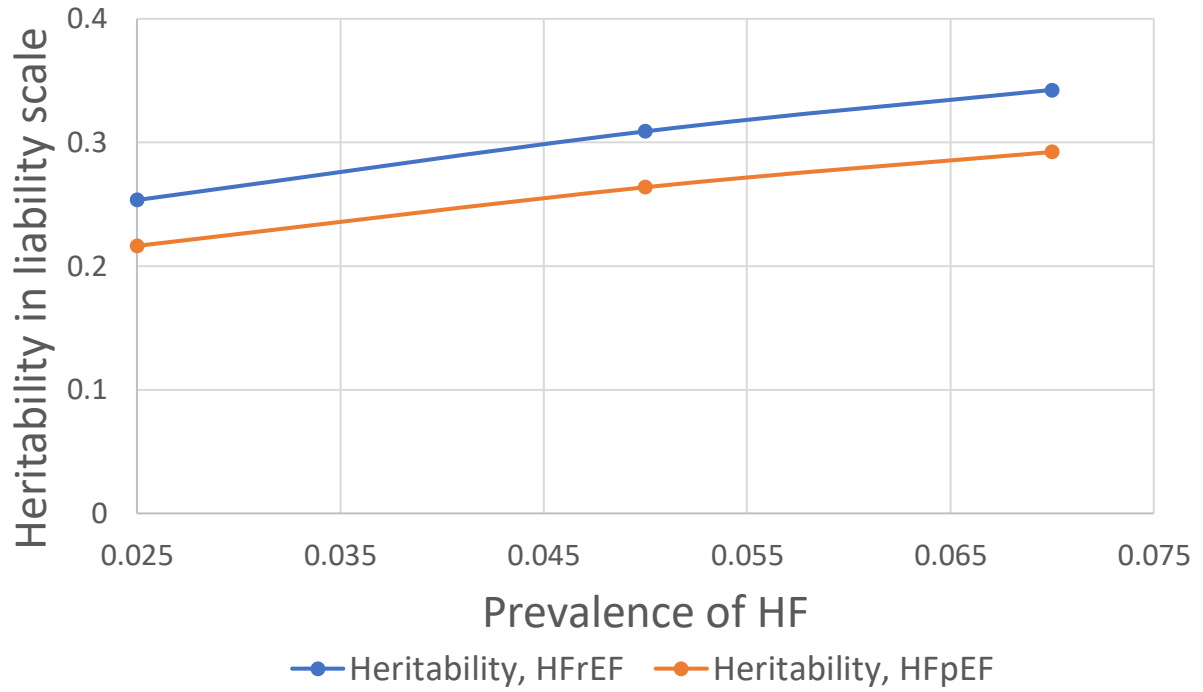

**VA Million Veteran Program: Core Acknowledgement for Publications**  
**Updated May 26, 2020**

**MVP Executive Committee**

- Co-Chair: J. Michael Gaziano, M.D., M.P.H.  
VA Boston Healthcare System, 150 S. Huntington Avenue, Boston, MA 02130
- Co-Chair: Sumitra Muralidhar, Ph.D.  
US Department of Veterans Affairs, 810 Vermont Avenue NW, Washington, DC 20420
- Rachel Ramoni, D.M.D., Sc.D., Chief VA Research and Development Officer  
US Department of Veterans Affairs, 810 Vermont Avenue NW, Washington, DC 20420
- Jean Beckham, Ph.D.  
Durham VA Medical Center, 508 Fulton Street, Durham, NC 27705
- Kyong-Mi Chang, M.D.  
Philadelphia VA Medical Center, 3900 Woodland Avenue, Philadelphia, PA 19104
- Christopher J. O'Donnell, M.D., M.P.H.  
VA Boston Healthcare System, 150 S. Huntington Avenue, Boston, MA 02130
- Philip S. Tsao, Ph.D.  
VA Palo Alto Health Care System, 3801 Miranda Avenue, Palo Alto, CA 94304
- James Breeling, M.D., Ex-Officio  
US Department of Veterans Affairs, 810 Vermont Avenue NW, Washington, DC 20420
- Grant Huang, Ph.D., Ex-Officio  
US Department of Veterans Affairs, 810 Vermont Avenue NW, Washington, DC 20420
- JP Casas Romero, M.D., Ph.D., Ex-Officio  
VA Boston Healthcare System, 150 S. Huntington Avenue, Boston, MA 02130

**MVP Program Office**

- Sumitra Muralidhar, Ph.D.  
US Department of Veterans Affairs, 810 Vermont Avenue NW, Washington, DC 20420
- Jennifer Moser, Ph.D.  
US Department of Veterans Affairs, 810 Vermont Avenue NW, Washington, DC 20420

**MVP Recruitment/Enrollment**

- Recruitment/Enrollment Director/Deputy Director, Boston – Stacey B. Whitbourne, Ph.D.; Jessica V. Brewer, M.P.H.  
VA Boston Healthcare System, 150 S. Huntington Avenue, Boston, MA 02130
- MVP Coordinating Centers
  - o Clinical Epidemiology Research Center (CERC), West Haven – Mihaela Aslan, Ph.D.  
West Haven VA Medical Center, 950 Campbell Avenue, West Haven, CT 06516
  - o Cooperative Studies Program Clinical Research Pharmacy Coordinating Center, Albuquerque – Todd Connor, Pharm.D.; Dean P. Argyres, B.S., M.S.  
New Mexico VA Health Care System, 1501 San Pedro Drive SE, Albuquerque, NM 87108
  - o Genomics Coordinating Center, Palo Alto – Philip S. Tsao, Ph.D.

- VA Palo Alto Health Care System, 3801 Miranda Avenue, Palo Alto, CA 94304
  - MVP Boston Coordinating Center, Boston - J. Michael Gaziano, M.D., M.P.H.
  - VA Boston Healthcare System, 150 S. Huntington Avenue, Boston, MA 02130
  - MVP Information Center, Canandaigua – Brady Stephens, M.S.
  - Canandaigua VA Medical Center, 400 Fort Hill Avenue, Canandaigua, NY 14424
- VA Central Biorepository, Boston – Mary T. Brophy M.D., M.P.H.; Donald E. Humphries, Ph.D.; Luis E. Selva, Ph.D.
- VA Boston Healthcare System, 150 S. Huntington Avenue, Boston, MA 02130
- MVP Informatics, Boston – Nhan Do, M.D.; Shahpoor Shayan
- VA Boston Healthcare System, 150 S. Huntington Avenue, Boston, MA 02130
- MVP Data Operations/Analytics, Boston – Kelly Cho, Ph.D.
- VA Boston Healthcare System, 150 S. Huntington Avenue, Boston, MA 02130

### **MVP Science**

- Science Operations – Christopher J. O’Donnell, M.D., M.P.H.
- VA Boston Healthcare System, 150 S. Huntington Avenue, Boston, MA 02130
- Genomics Core - Christopher J. O’Donnell, M.D., M.P.H.; Saiju Pyarajan Ph.D.
- VA Boston Healthcare System, 150 S. Huntington Avenue, Boston, MA 02130
- Philip S. Tsao, Ph.D.
- VA Palo Alto Health Care System, 3801 Miranda Avenue, Palo Alto, CA 94304
- Phenomics Core- Kelly Cho, M.P.H, Ph.D.
- VA Boston Healthcare System, 150 S. Huntington Avenue, Boston, MA 02130
- Data and Computational Sciences – Saiju Pyarajan, Ph.D.
- VA Boston Healthcare System, 150 S. Huntington Avenue, Boston, MA 02130
- Statistical Genetics – Elizabeth Hauser, Ph.D.
- Durham VA Medical Center, 508 Fulton Street, Durham, NC 27705
- Yan Sun, Ph.D.
- Atlanta VA Medical Center, 1670 Clairmont Road, Decatur, GA 30033
- Hongyu Zhao, Ph.D.
- West Haven VA Medical Center, 950 Campbell Avenue, West Haven, CT 06516

### **Current MVP Local Site Investigators**

- Atlanta VA Medical Center (Peter Wilson, M.D.)
- 1670 Clairmont Road, Decatur, GA 30033
- Bay Pines VA Healthcare System (Rachel McArdle, Ph.D.)
- 10,000 Bay Pines Blvd Bay Pines, FL 33744
- Birmingham VA Medical Center (Louis Dellitalia, M.D.)
- 700 S. 19th Street, Birmingham AL 35233
- Central Western Massachusetts Healthcare System (Kristin Mattocks, Ph.D., M.P.H.)
- 421 North Main Street, Leeds, MA 01053
- Cincinnati VA Medical Center (John Harley, M.D., Ph.D.)
- 3200 Vine Street, Cincinnati, OH 45220
- Clement J. Zablocki VA Medical Center (Jeffrey Whittle, M.D., M.P.H.)
- 5000 West National Avenue, Milwaukee, WI 53295
- VA Northeast Ohio Healthcare System (Frank Jacono, M.D.)

- 10701 East Boulevard, Cleveland, OH 44106
- Durham VA Medical Center (Jean Beckham, Ph.D.)  
508 Fulton Street, Durham, NC 27705
- Edith Nourse Rogers Memorial Veterans Hospital (John Wells., Ph.D.)  
200 Springs Road, Bedford, MA 01730
- Edward Hines, Jr. VA Medical Center (Salvador Gutierrez, M.D.)  
5000 South 5th Avenue, Hines, IL 60141
- Veterans Health Care System of the Ozarks (Gretchen Gibson, D.D.S., M.P.H.)  
1100 North College Avenue, Fayetteville, AR 72703
- Fargo VA Health Care System (Kimberly Hammer, Ph.D.)  
2101 N. Elm, Fargo, ND 58102
- VA Health Care Upstate New York (Laurence Kaminsky, Ph.D.)  
113 Holland Avenue, Albany, NY 12208
- New Mexico VA Health Care System (Gerardo Villareal, M.D.)  
1501 San Pedro Drive, S.E. Albuquerque, NM 87108
- VA Boston Healthcare System (Scott Kinlay, M.B.B.S., Ph.D.)  
150 S. Huntington Avenue, Boston, MA 02130
- VA Western New York Healthcare System (Junzhe Xu, M.D.)  
3495 Bailey Avenue, Buffalo, NY 14215-1199
- Ralph H. Johnson VA Medical Center (Mark Hamner, M.D.)  
109 Bee Street, Mental Health Research, Charleston, SC 29401
- Columbia VA Health Care System (Roy Mathew, M.D.)  
6439 Garners Ferry Road, Columbia, SC 29209
- VA North Texas Health Care System (Sujata Bhushan, M.D.)  
4500 S. Lancaster Road, Dallas, TX 75216
- Hampton VA Medical Center (Pran Iruvanti, D.O., Ph.D.)  
100 Emancipation Drive, Hampton, VA 23667
- Richmond VA Medical Center (Michael Godschalk, M.D.)  
1201 Broad Rock Blvd., Richmond, VA 23249
- Iowa City VA Health Care System (Zuhair Ballas, M.D.)  
601 Highway 6 West, Iowa City, IA 52246-2208
- Eastern Oklahoma VA Health Care System (Douglas Ivins, M.D.)  
1011 Honor Heights Drive, Muskogee, OK 74401
- James A. Haley Veterans' Hospital (Stephen Mastorides, M.D.)  
13000 Bruce B. Downs Blvd, Tampa, FL 33612
- James H. Quillen VA Medical Center (Jonathan Moorman, M.D., Ph.D.)  
Corner of Lamont & Veterans Way, Mountain Home, TN 37684
- John D. Dingell VA Medical Center (Saib Gappy, M.D.)  
4646 John R Street, Detroit, MI 48201
- Louisville VA Medical Center (Jon Klein, M.D., Ph.D.)  
800 Zorn Avenue, Louisville, KY 40206
- Manchester VA Medical Center (Nora Ratcliffe, M.D.)  
718 Smyth Road, Manchester, NH 03104

- Miami VA Health Care System (Hermes Florez, M.D., Ph.D.)  
1201 NW 16th Street, 11 GRC, Miami FL 33125
- Michael E. DeBakey VA Medical Center (Olaoluwa Okusaga, M.D.)  
2002 Holcombe Blvd, Houston, TX 77030
- Minneapolis VA Health Care System (Maureen Murdoch, M.D., M.P.H.)  
One Veterans Drive, Minneapolis, MN 55417
- N. FL/S. GA Veterans Health System (Peruvemba Sriram, M.D.)  
1601 SW Archer Road, Gainesville, FL 32608
- Northport VA Medical Center (Shing Shing Yeh, Ph.D., M.D.)  
79 Middleville Road, Northport, NY 11768
- Overton Brooks VA Medical Center (Neeraj Tandon, M.D.)  
510 East Stoner Ave, Shreveport, LA 71101
- Philadelphia VA Medical Center (Darshana Jhala, M.D.)  
3900 Woodland Avenue, Philadelphia, PA 19104
- Phoenix VA Health Care System (Samuel Aguayo, M.D.)  
650 E. Indian School Road, Phoenix, AZ 85012
- Portland VA Medical Center (David Cohen, M.D.)  
3710 SW U.S. Veterans Hospital Road, Portland, OR 97239
- Providence VA Medical Center (Satish Sharma, M.D.)  
830 Chalkstone Avenue, Providence, RI 02908
- Richard Roudebush VA Medical Center (Suthat Liangpunsakul, M.D., M.P.H.)  
1481 West 10th Street, Indianapolis, IN 46202
- Salem VA Medical Center (Kris Ann Oursler, M.D.)  
1970 Roanoke Blvd, Salem, VA 24153
- San Francisco VA Health Care System (Mary Whooley, M.D.)  
4150 Clement Street, San Francisco, CA 94121
- South Texas Veterans Health Care System (Sunil Ahuja, M.D.)  
7400 Merton Minter Boulevard, San Antonio, TX 78229
- Southeast Louisiana Veterans Health Care System (Joseph Constans, Ph.D.)  
2400 Canal Street, New Orleans, LA 70119
- Southern Arizona VA Health Care System (Paul Meyer, M.D., Ph.D.)  
3601 S 6th Avenue, Tucson, AZ 85723
- Sioux Falls VA Health Care System (Jennifer Greco, M.D.)  
2501 W 22nd Street, Sioux Falls, SD 57105
- St. Louis VA Health Care System (Michael Rauchman, M.D.)  
915 North Grand Blvd, St. Louis, MO 63106
- Syracuse VA Medical Center (Richard Servatius, Ph.D.)  
800 Irving Avenue, Syracuse, NY 13210
- VA Eastern Kansas Health Care System (Melinda Gaddy, Ph.D.)  
4101 S 4th Street Trafficway, Leavenworth, KS 66048
- VA Greater Los Angeles Health Care System (Agnes Wallbom, M.D., M.S.)  
11301 Wilshire Blvd, Los Angeles, CA 90073
- VA Long Beach Healthcare System (Timothy Morgan, M.D.)

- 5901 East 7th Street Long Beach, CA 90822
- VA Maine Healthcare System (Todd Stapley, D.O.)  
1 VA Center, Augusta, ME 04330
- VA New York Harbor Healthcare System (Scott Sherman, M.D., M.P.H.)  
423 East 23rd Street, New York, NY 10010
- VA Pacific Islands Health Care System (George Ross, M.D.)  
459 Patterson Rd, Honolulu, HI 96819
- VA Palo Alto Health Care System (Philip Tsao, Ph.D.)  
3801 Miranda Avenue, Palo Alto, CA 94304-1290
- VA Pittsburgh Health Care System (Patrick Strollo, Jr., M.D.)  
University Drive, Pittsburgh, PA 15240
- VA Puget Sound Health Care System (Edward Boyko, M.D.)  
1660 S. Columbian Way, Seattle, WA 98108-1597
- VA Salt Lake City Health Care System (Laurence Meyer, M.D., Ph.D.)  
500 Foothill Drive, Salt Lake City, UT 84148
- VA San Diego Healthcare System (Samir Gupta, M.D., M.S.C.S.)  
3350 La Jolla Village Drive, San Diego, CA 92161
- VA Sierra Nevada Health Care System (Mostaqul Huq, Pharm.D., Ph.D.)  
975 Kirman Avenue, Reno, NV 89502
- VA Southern Nevada Healthcare System (Joseph Fayad, M.D.)  
6900 North Pecos Road, North Las Vegas, NV 89086
- VA Tennessee Valley Healthcare System (Adriana Hung, M.D., M.P.H.)  
1310 24th Avenue, South Nashville, TN 37212
- Washington DC VA Medical Center (Jack Lichy, M.D., Ph.D.)  
50 Irving St, Washington, D. C. 20422
- W.G. (Bill) Hefner VA Medical Center (Robin Hurley, M.D.)  
1601 Brenner Ave, Salisbury, NC 28144
- White River Junction VA Medical Center (Brooks Robey, M.D.)  
163 Veterans Drive, White River Junction, VT 05009
- William S. Middleton Memorial Veterans Hospital (Robert Striker, M.D., Ph.D.)  
2500 Overlook Terrace, Madison, WI 53705
